# Supplementary material
Source: publisher figshare collection journal article supplement (https://tandf.figshare.com/articles/dataset/_/5619658)
Supplement: Supplementary file 1 [file 1]

**Inventory and review of the Mio-Pleistocene São Jorge flora  
(Madeira Island, Portugal): palaeoecological and biogeographical  
implications**

Carlos A. Góis-Marques, José Madeira and  
Miguel Menezes de Sequeira

## **Supplementary Material 2**

Line drawings and fossil photographs of the specimens

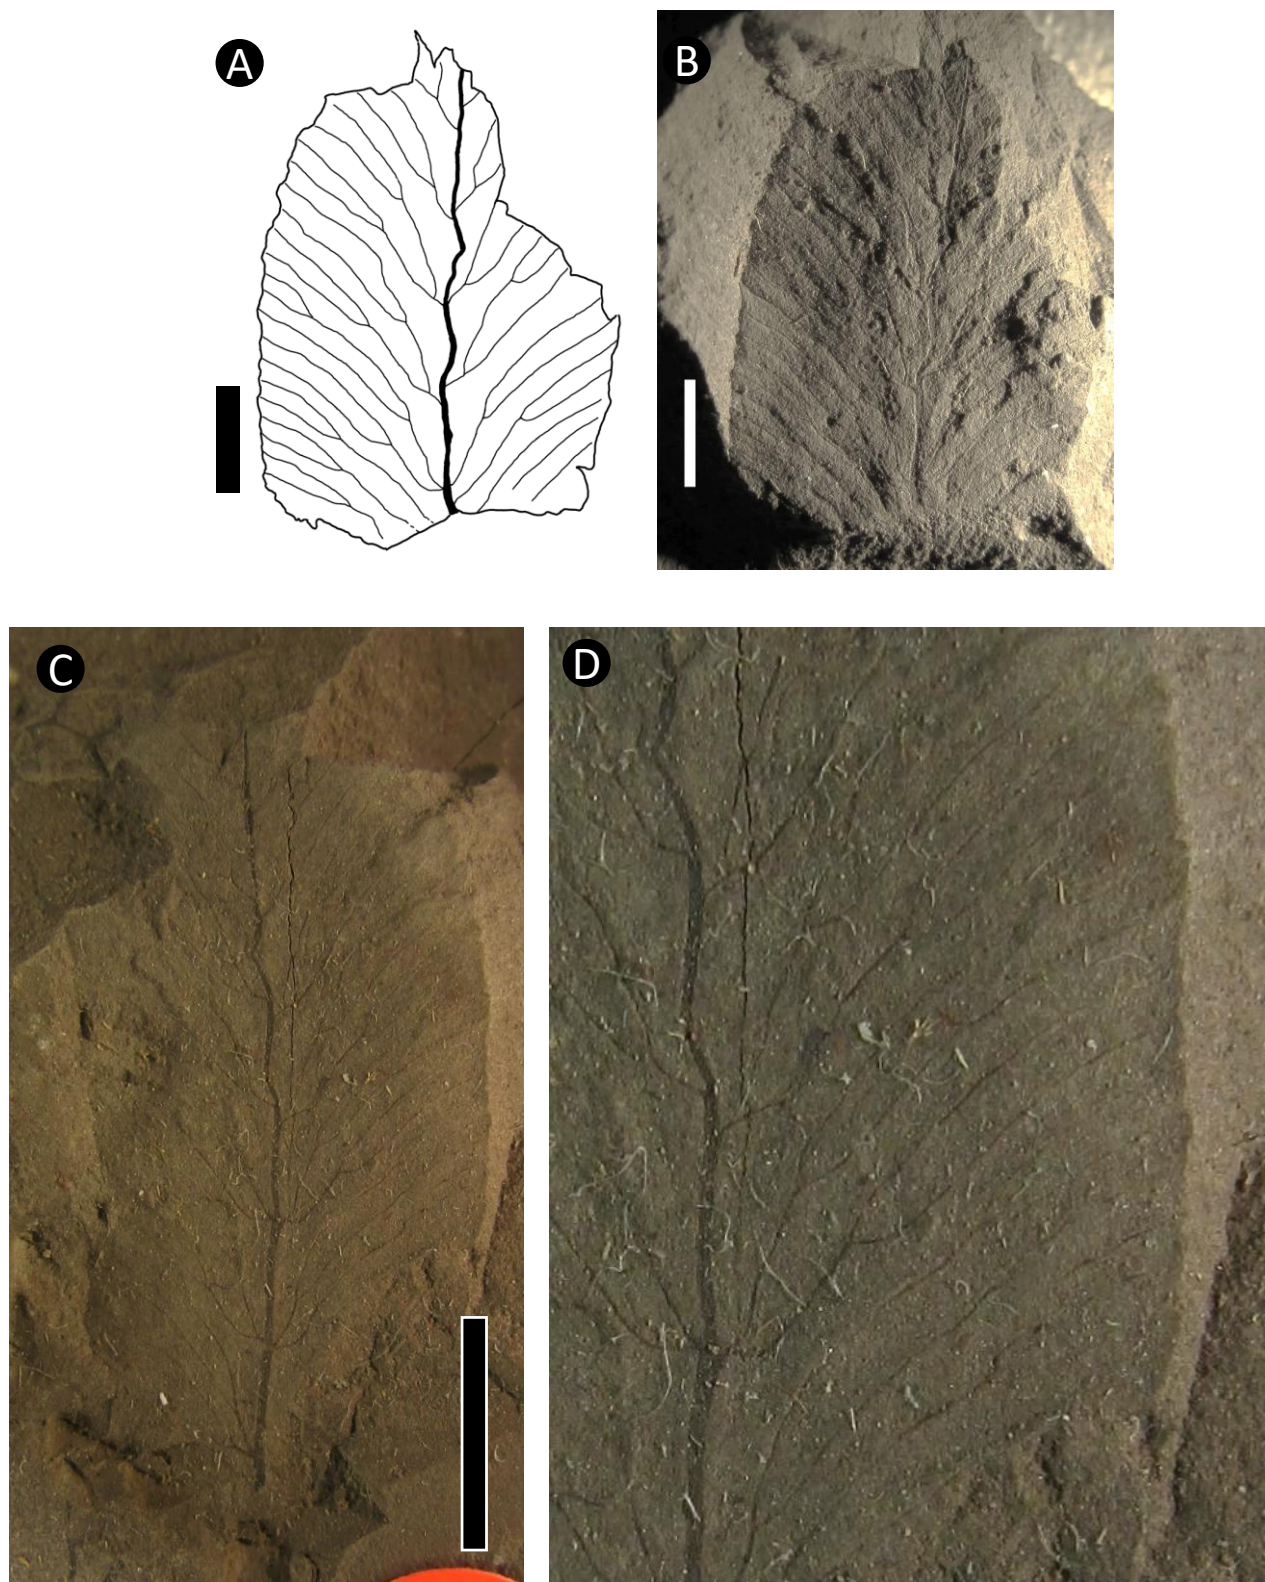

**Figure 1.** *Osmunda* sp.: **A** and **B**, ETH-Z-ERDW 3704, line drawing and photograph respectively. Scale bar is 0.5cm long ; **C**, photograph of ETH-Z-ERDW 2392; **D**, detail photograph showing the venation of ETH-Z-ERDW 2392. Scale bars are 1 cm long.

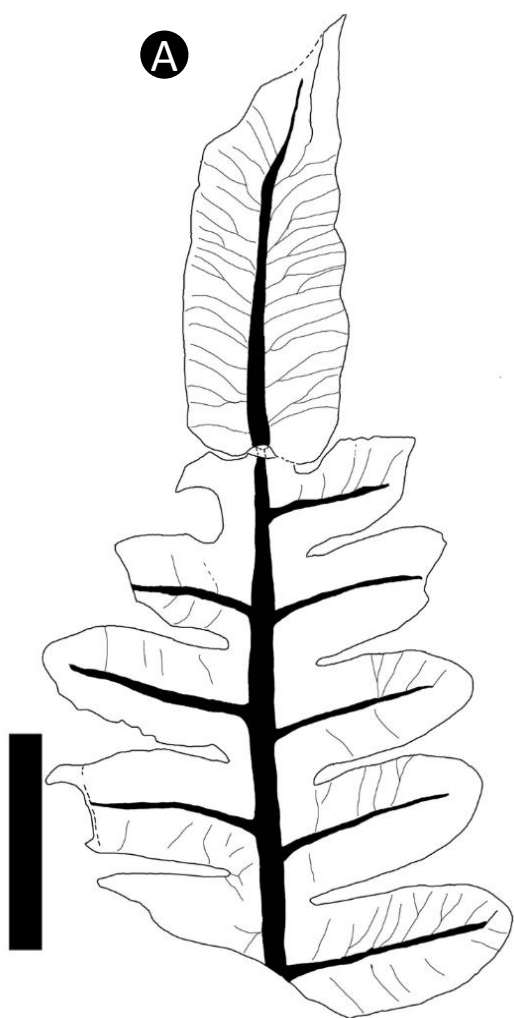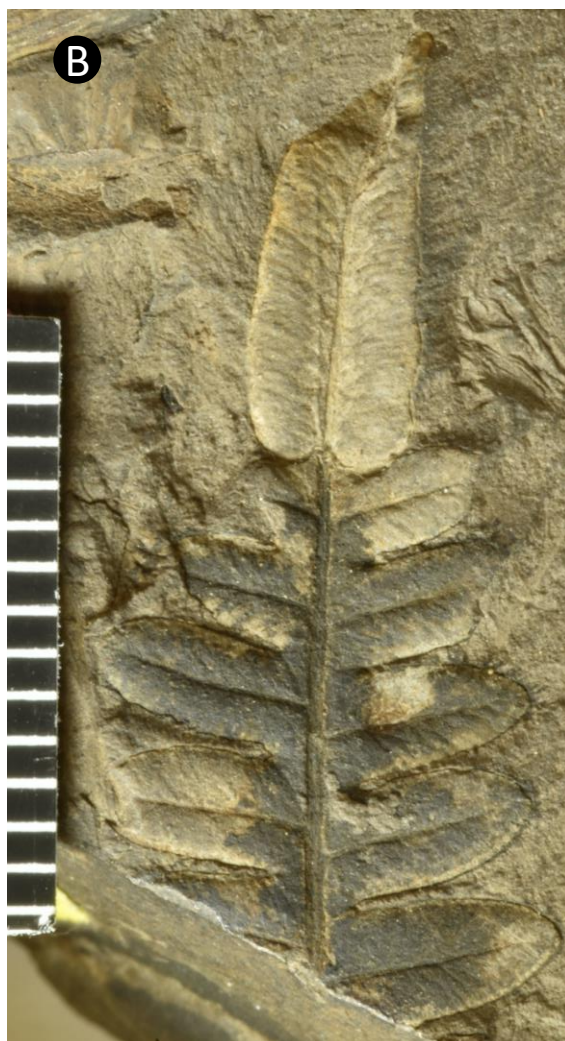

**Figure 2.** *Pteridium aquilinum* (NHMUK V19893): **A**, line drawing ; **B**, photograph. Scale bar is 0.5cm long.



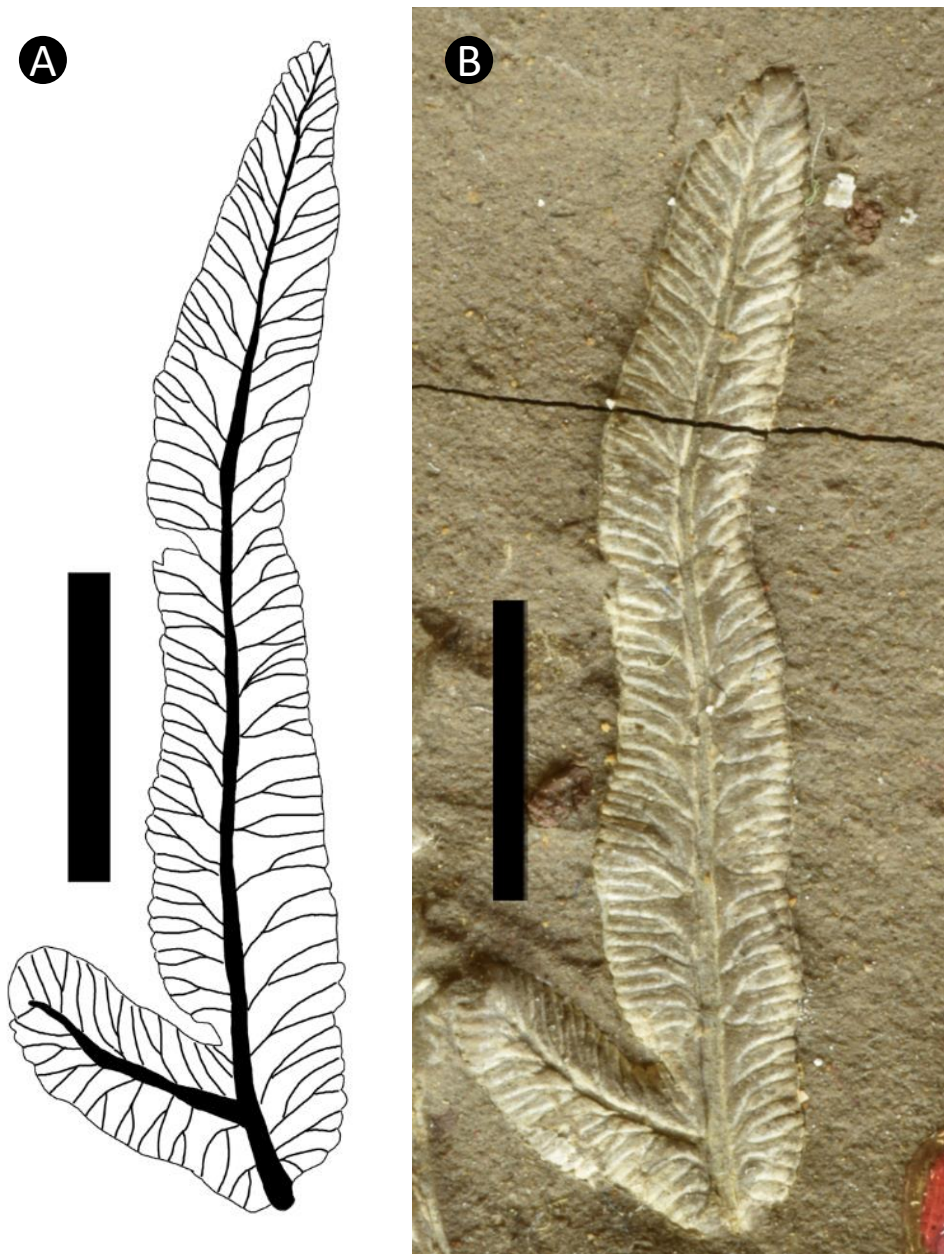

**Figure 3.** *Pteridium aquilinum* (NHMUK: V19894): **A**, line drawing; **B**, photograph. Scale bar is 0.5cm long.



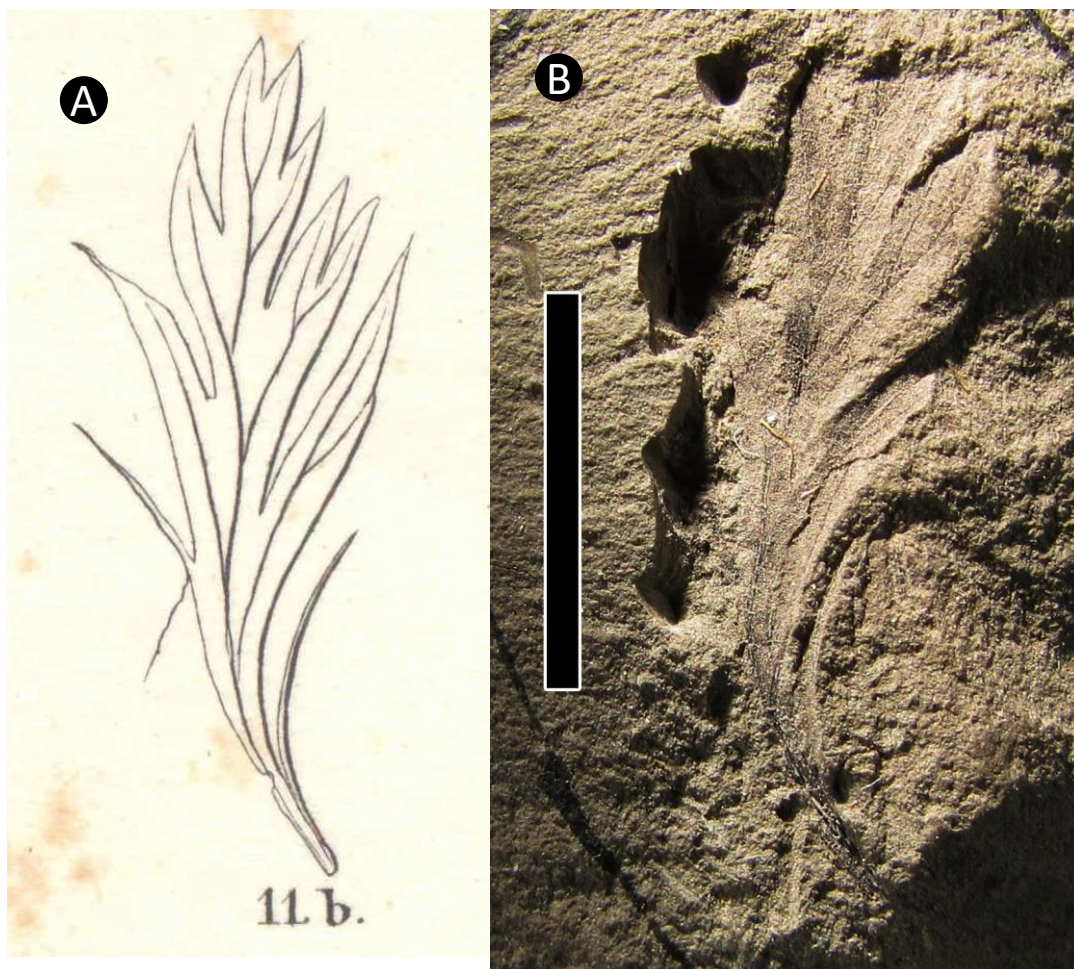

**Figure 4.** *Asplenium* cf. *onopteris* (ETH-Z-ERDW 5463): **A**, line drawing (extracted from Heer 1857, pl. I, fig. 11b); **B**, photograph. Scale bar is 0.5 cm long.

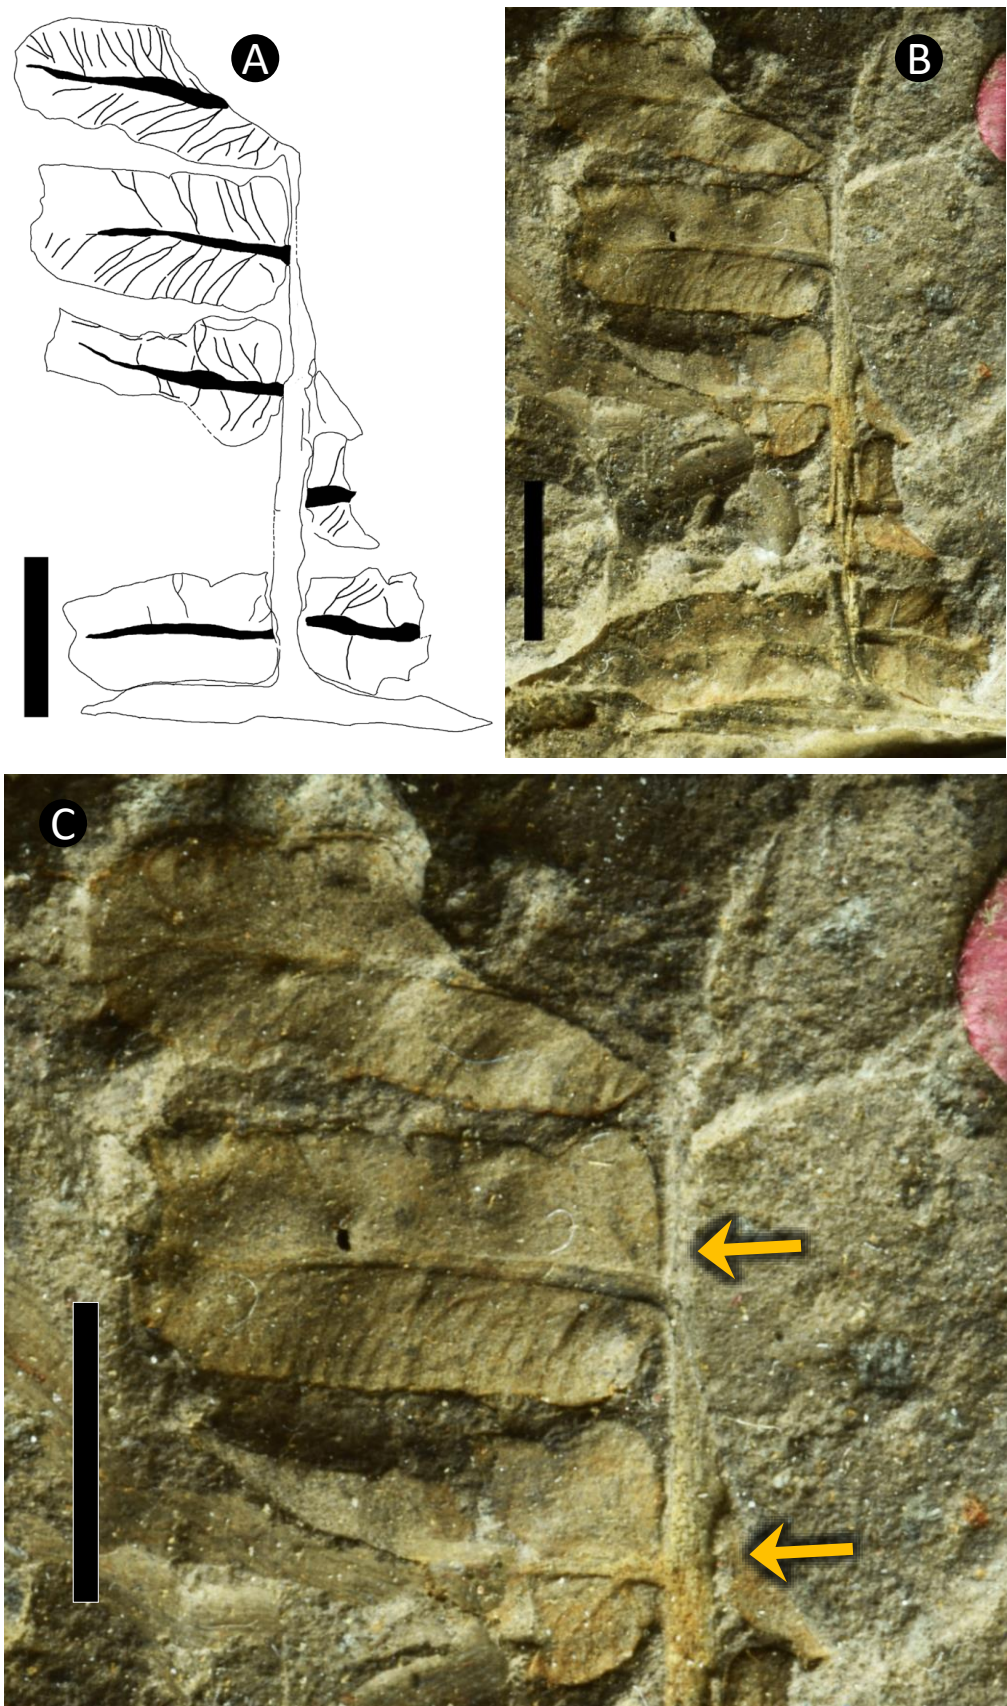

**Figure 5.** aff. *Asplenium* (NHMUK V19895): **A**, line drawing; **B**, photograph; **C**, detail of the sessile insertion of the ultimate segments (arrows). Scale bars are 0.5cm long.



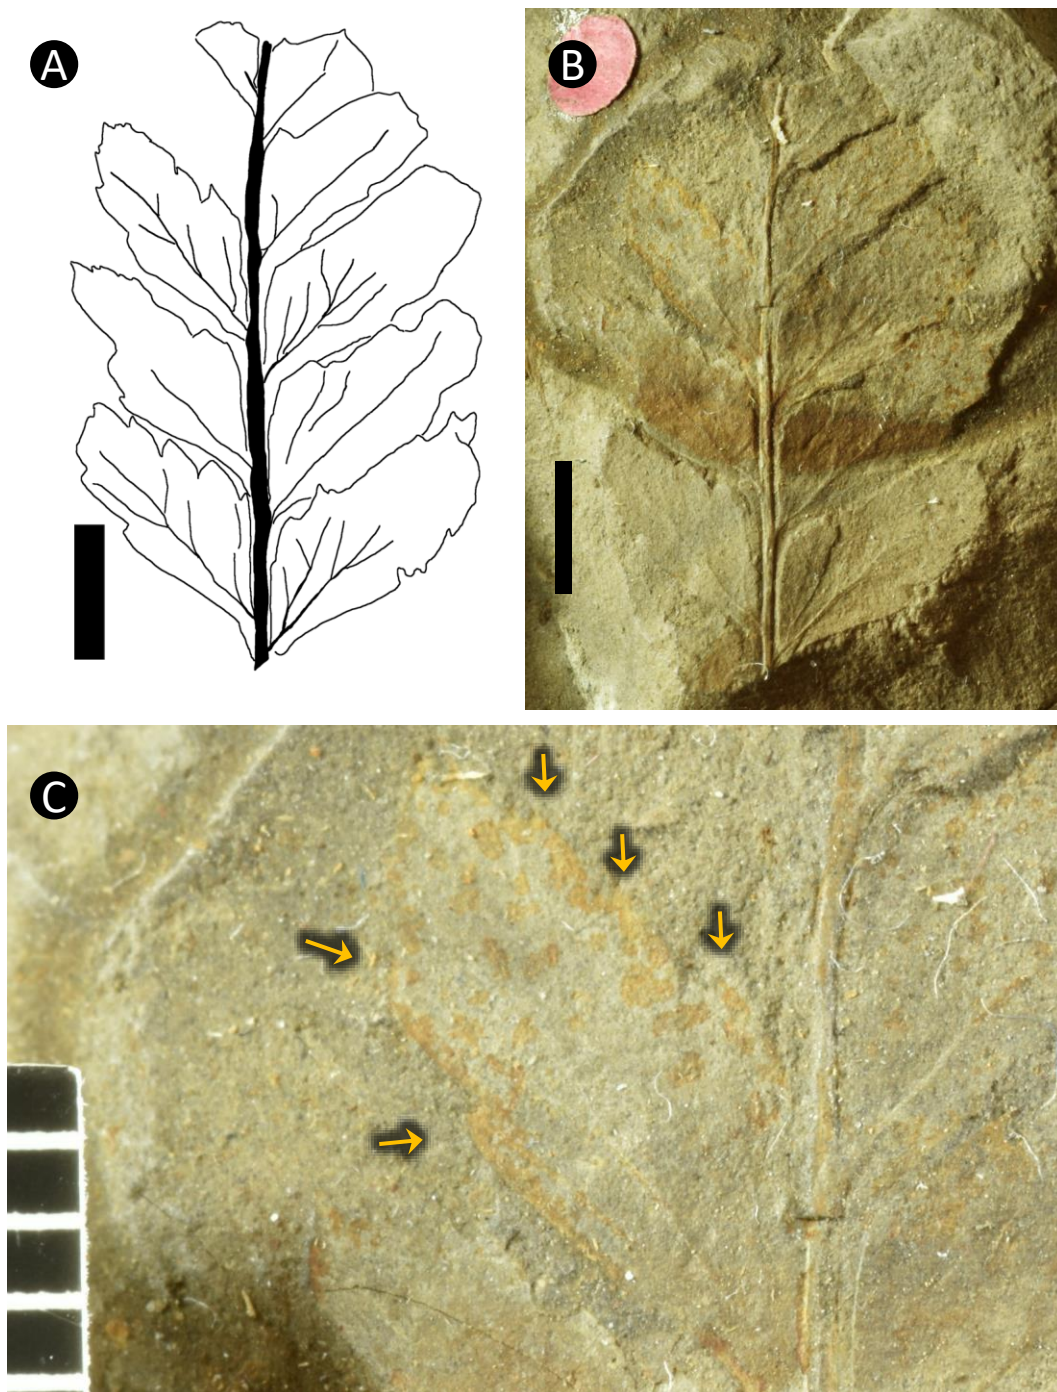

**Figure 6.** cf. *Polystichum* (NHMUK V19901). **A**, line drawing; **B**, photograph; scale bars are 0.5cm long. **C**, detail of the ultimate segments showing the venation and margin regularly serrate (arrows). Scale in mm.



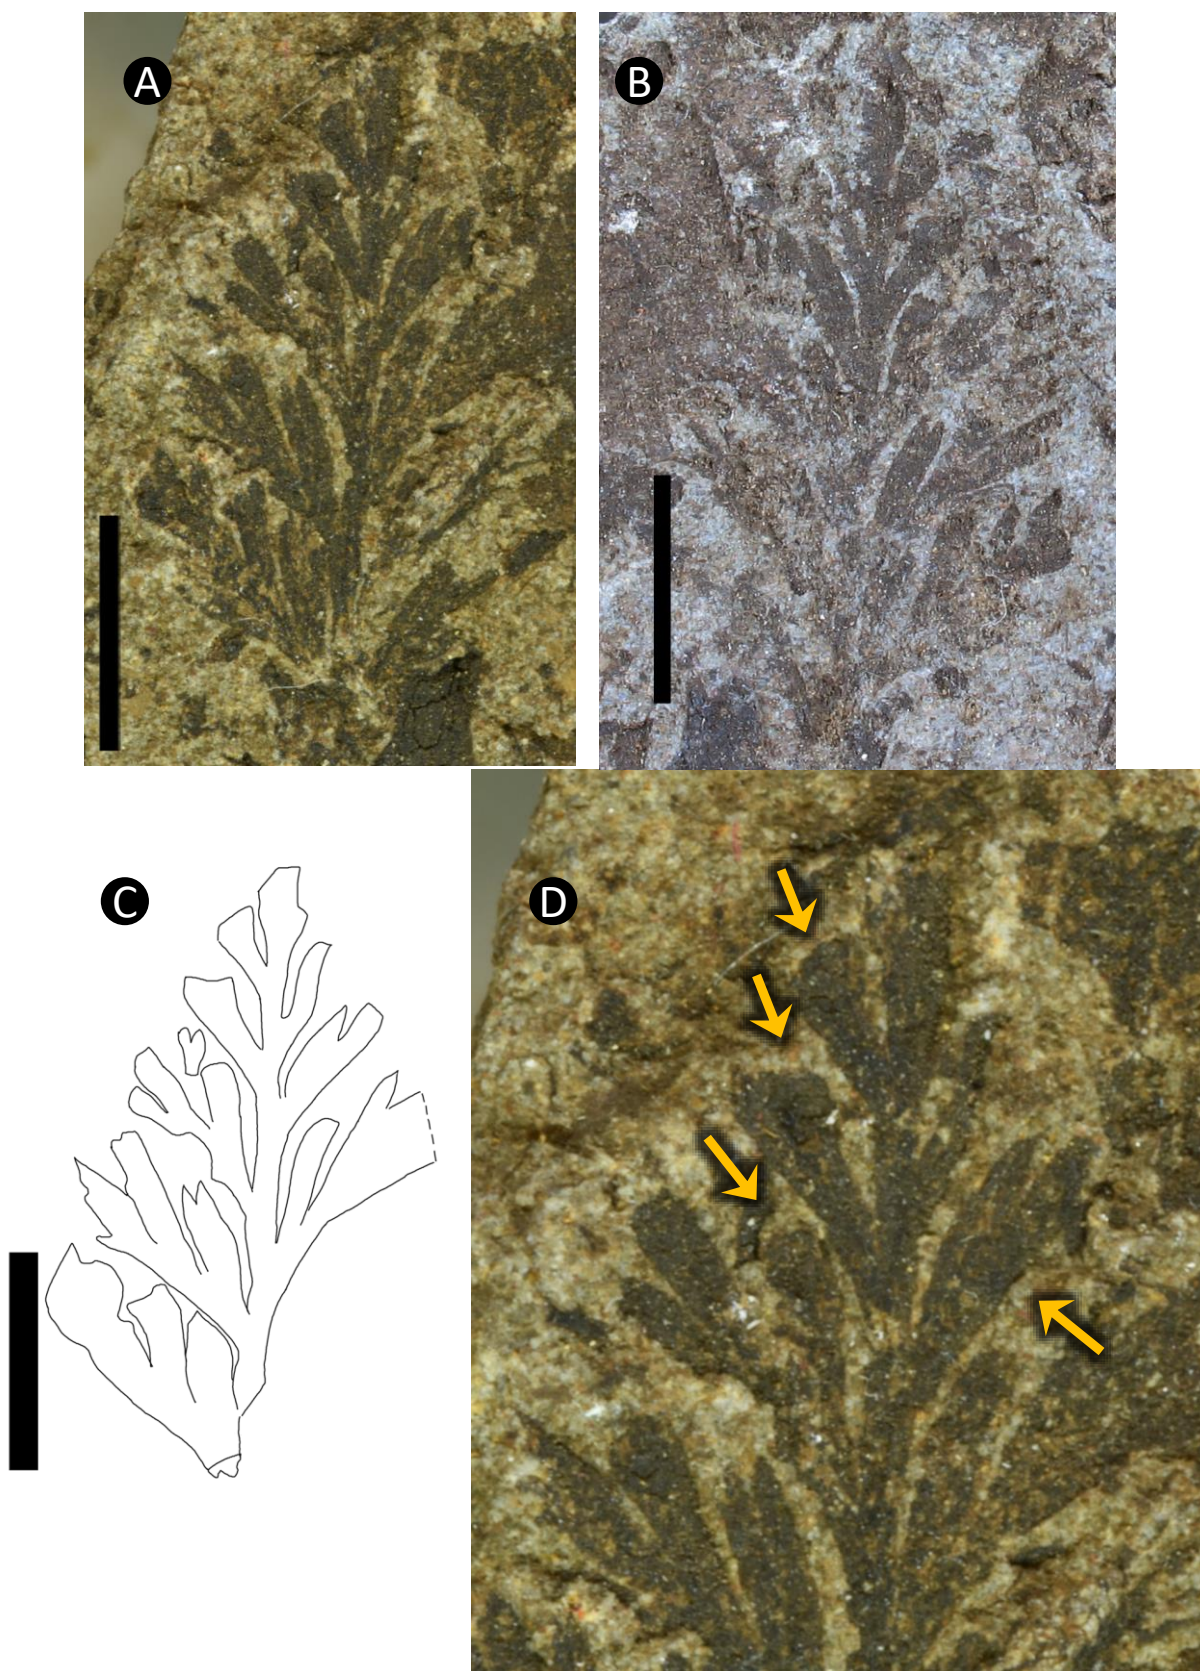

**Figure 7.** cf. *Davallia*: **A**, photograph of NHMUK V19890; **B**, photograph of SMC specimen (unnumbered). These two specimens are part and counterpart respectively; **C**, line drawing of NHMUK V19890; **D**, detail of NHMUK V19890 with the round structures similar to the indusia of *D. canariensis*. Scale bar is 0.5cm long.



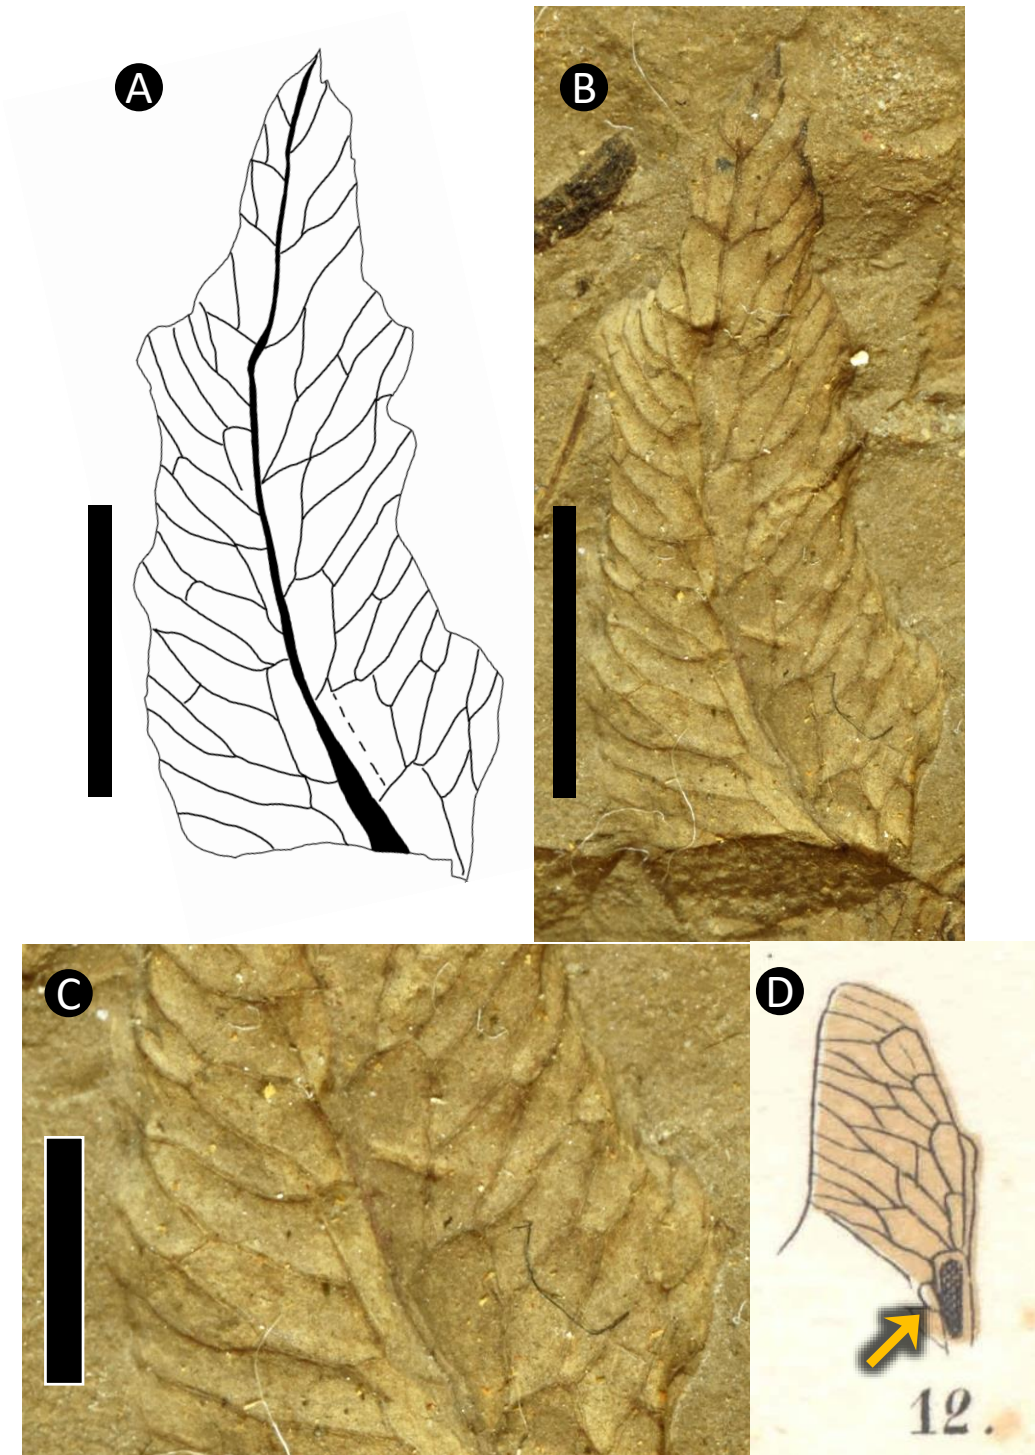

**Figure 8.** *Woodwardia radicans* (NHMUK V19898): **A**, line drawing; **B**, photograph; **C**, photographic detail of the anastomosed venation; **D**, line drawing published by Heer (1857, pl. I, fig. 12), showing the position of the sorus (arrow). This specimen is missing from the ETH-Z-ERDW. Scale bars are 0.5cm long in **A**, and in **B**, 0,25cm long in **C**.

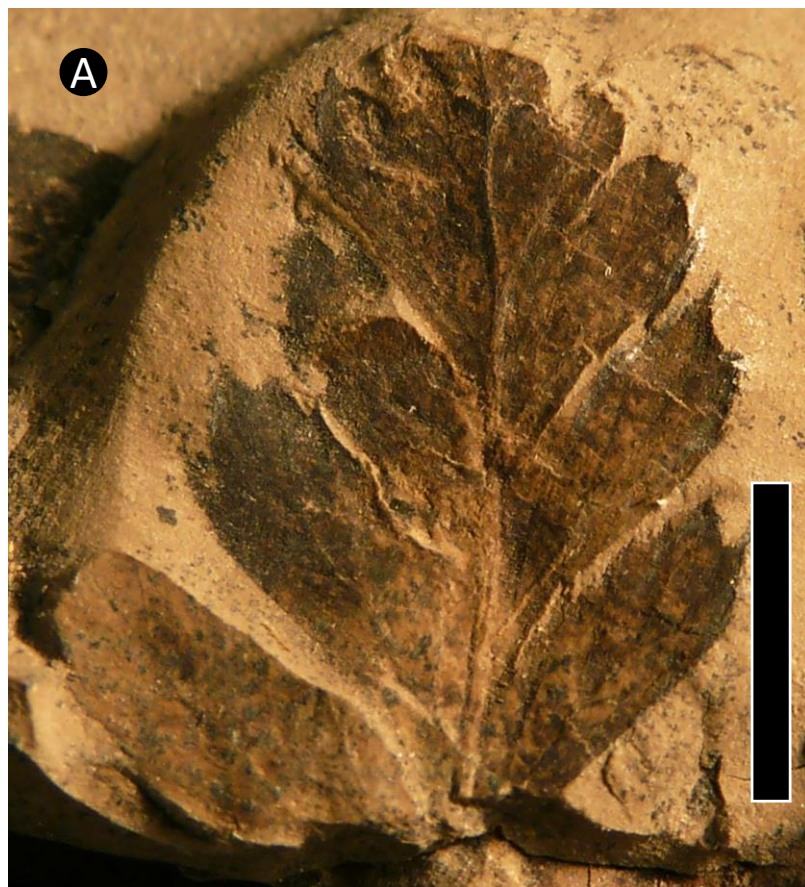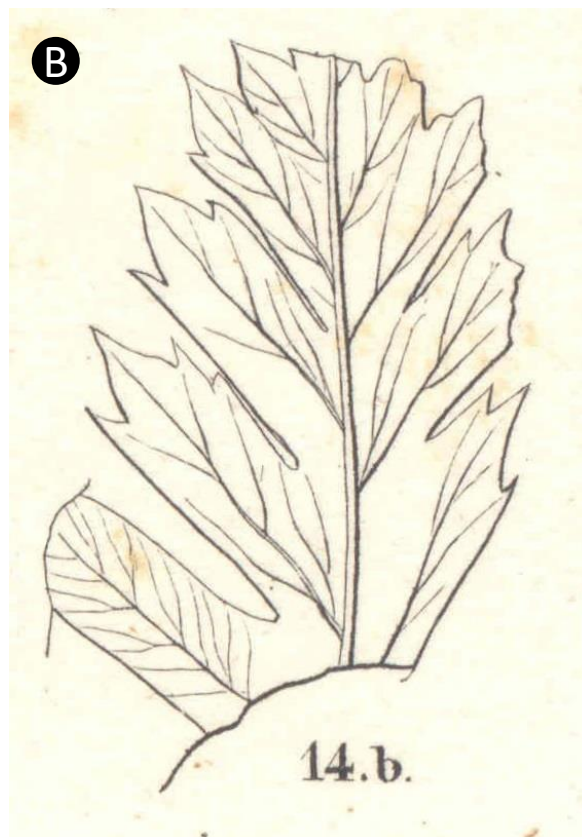

**Figure 9.** *Filicopsida* gen. et. sp. indet. 1 (ETH-Z-ERDW: 2841). **A**, photograph of the specimen (Photograph by Geological and Palaeontological Collection at ETH, Andreas Mueller); **B**, line drawing by Heer (1857, pl. I, fig. 14b). Scale bar is 0.5cm long.



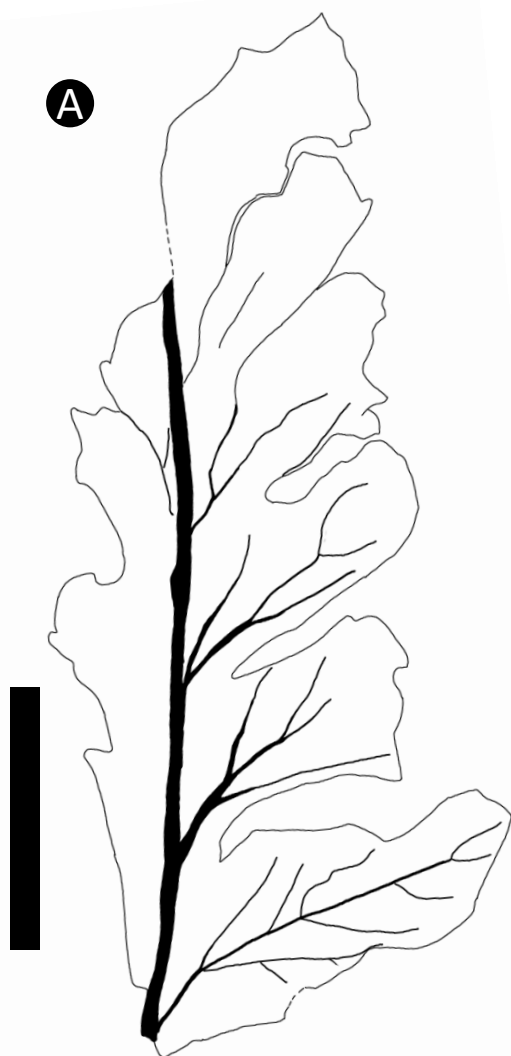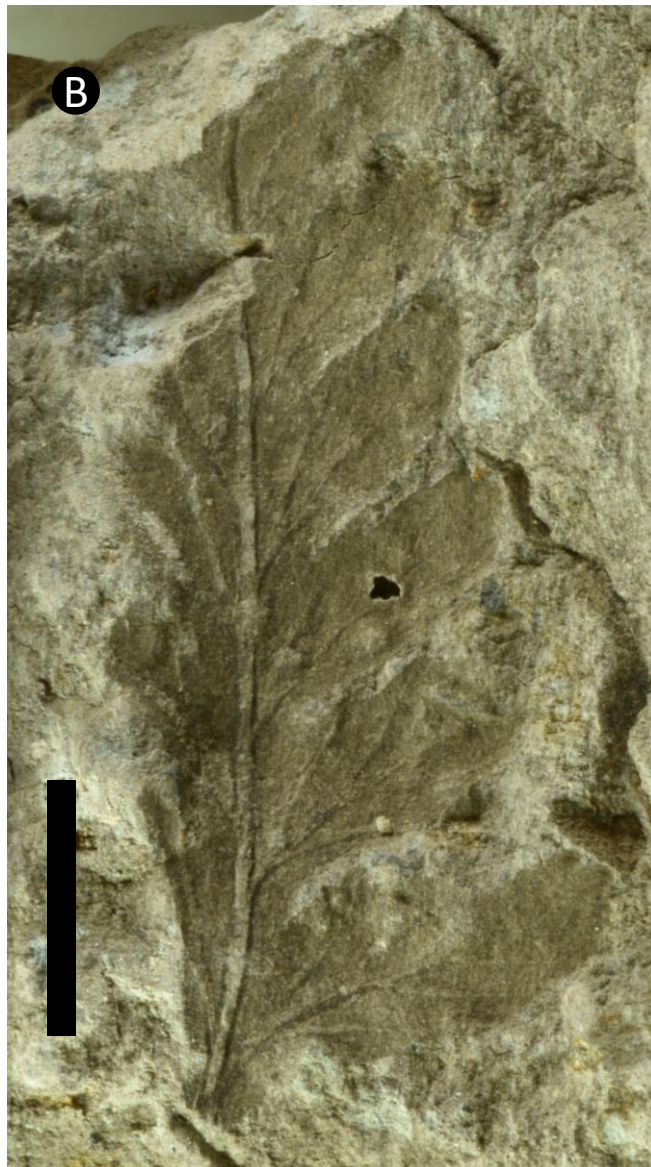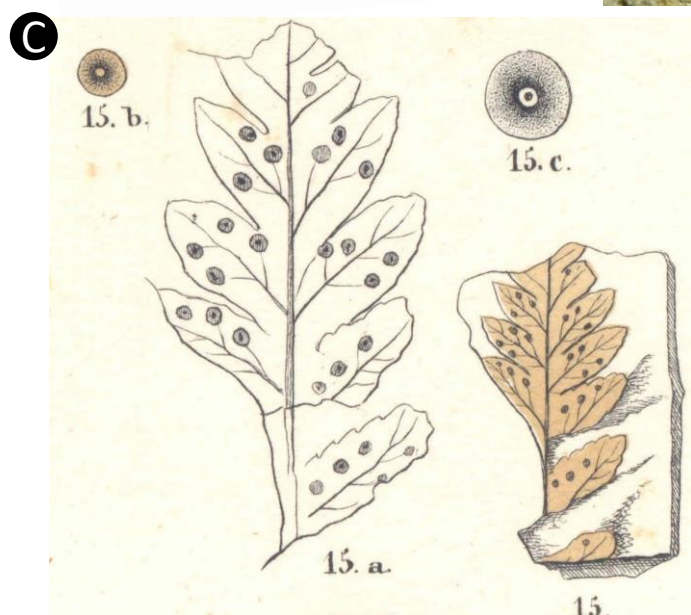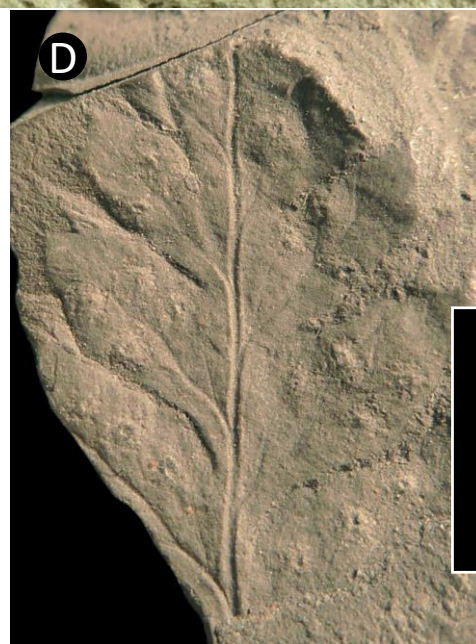

**Figure 10.** *Filicopsida* gen. *et.* sp. indet. 2: **A** and **B** line drawing and photograph of the specimen NHMUK V19899a; **C**, line drawing by Heer (1857, pl. I, figs. 15, 15a-15c) of specimen ETH- Z-ERDW 5740 showing the general morphology and the sori; **D**, photograph ETH- Z-ERDW 5740 (Andreas Mueller, Geological and Palaeontological Collection at ETH). Scale bars are 0.5cm long.



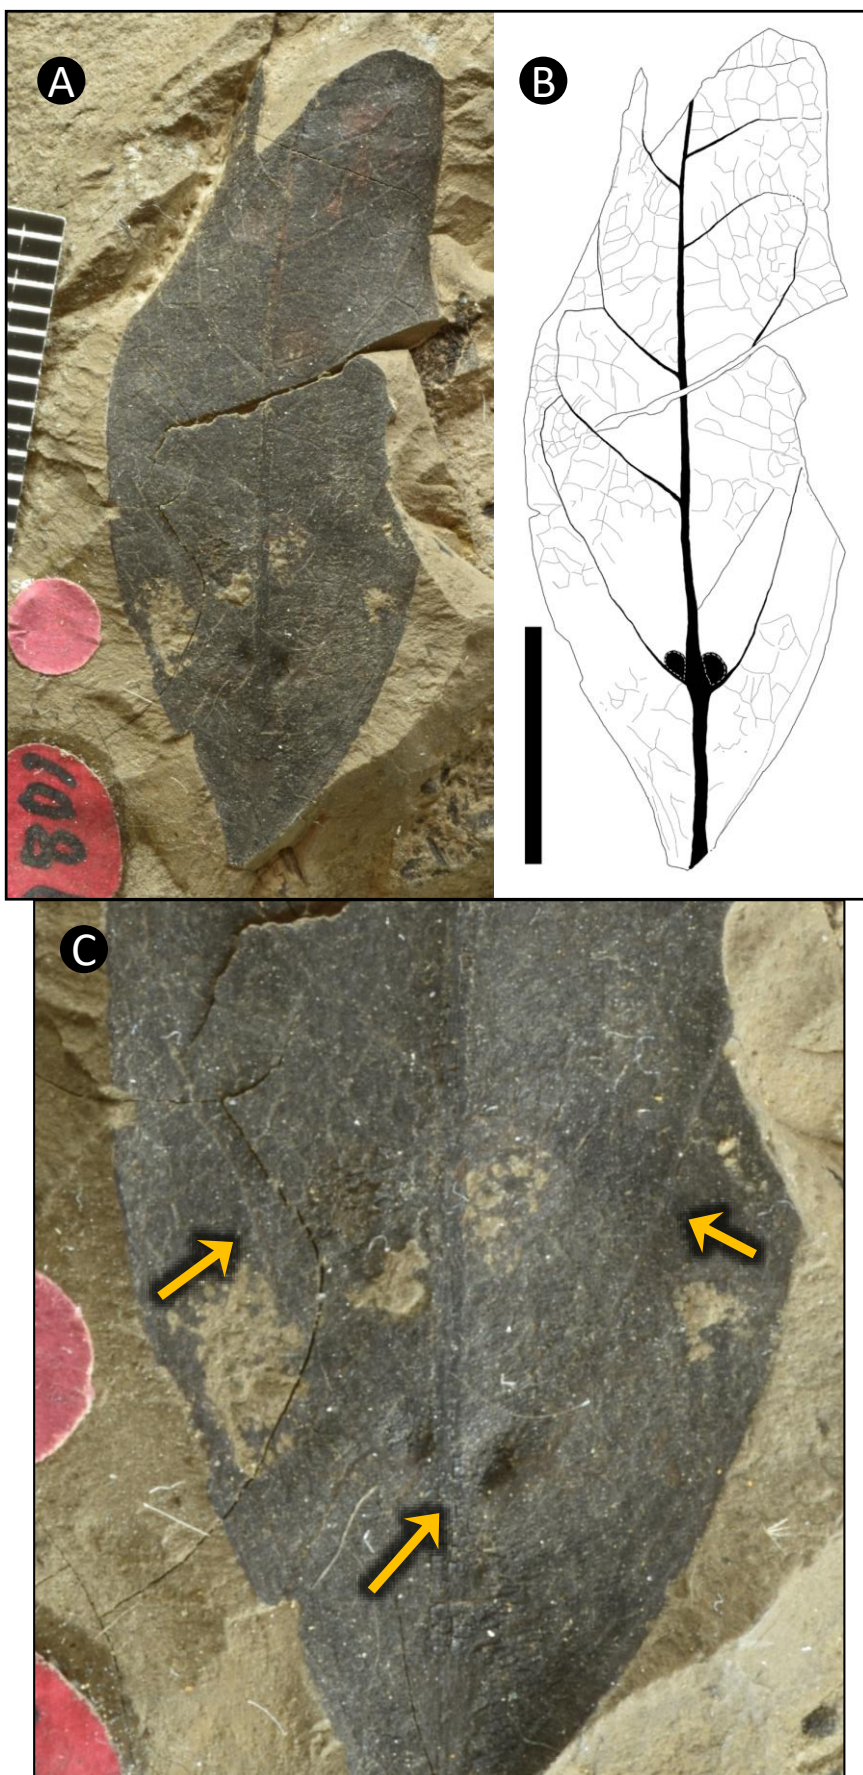

**Figure 11.** *Ocotea foetens* (NHMUK V19906): **A**, photograph; **B**, line drawing; **C**, detail of the two large superficial laminar glands in the axil of the most basal secondary veins (arrows). Scale bars are 1 cm long.

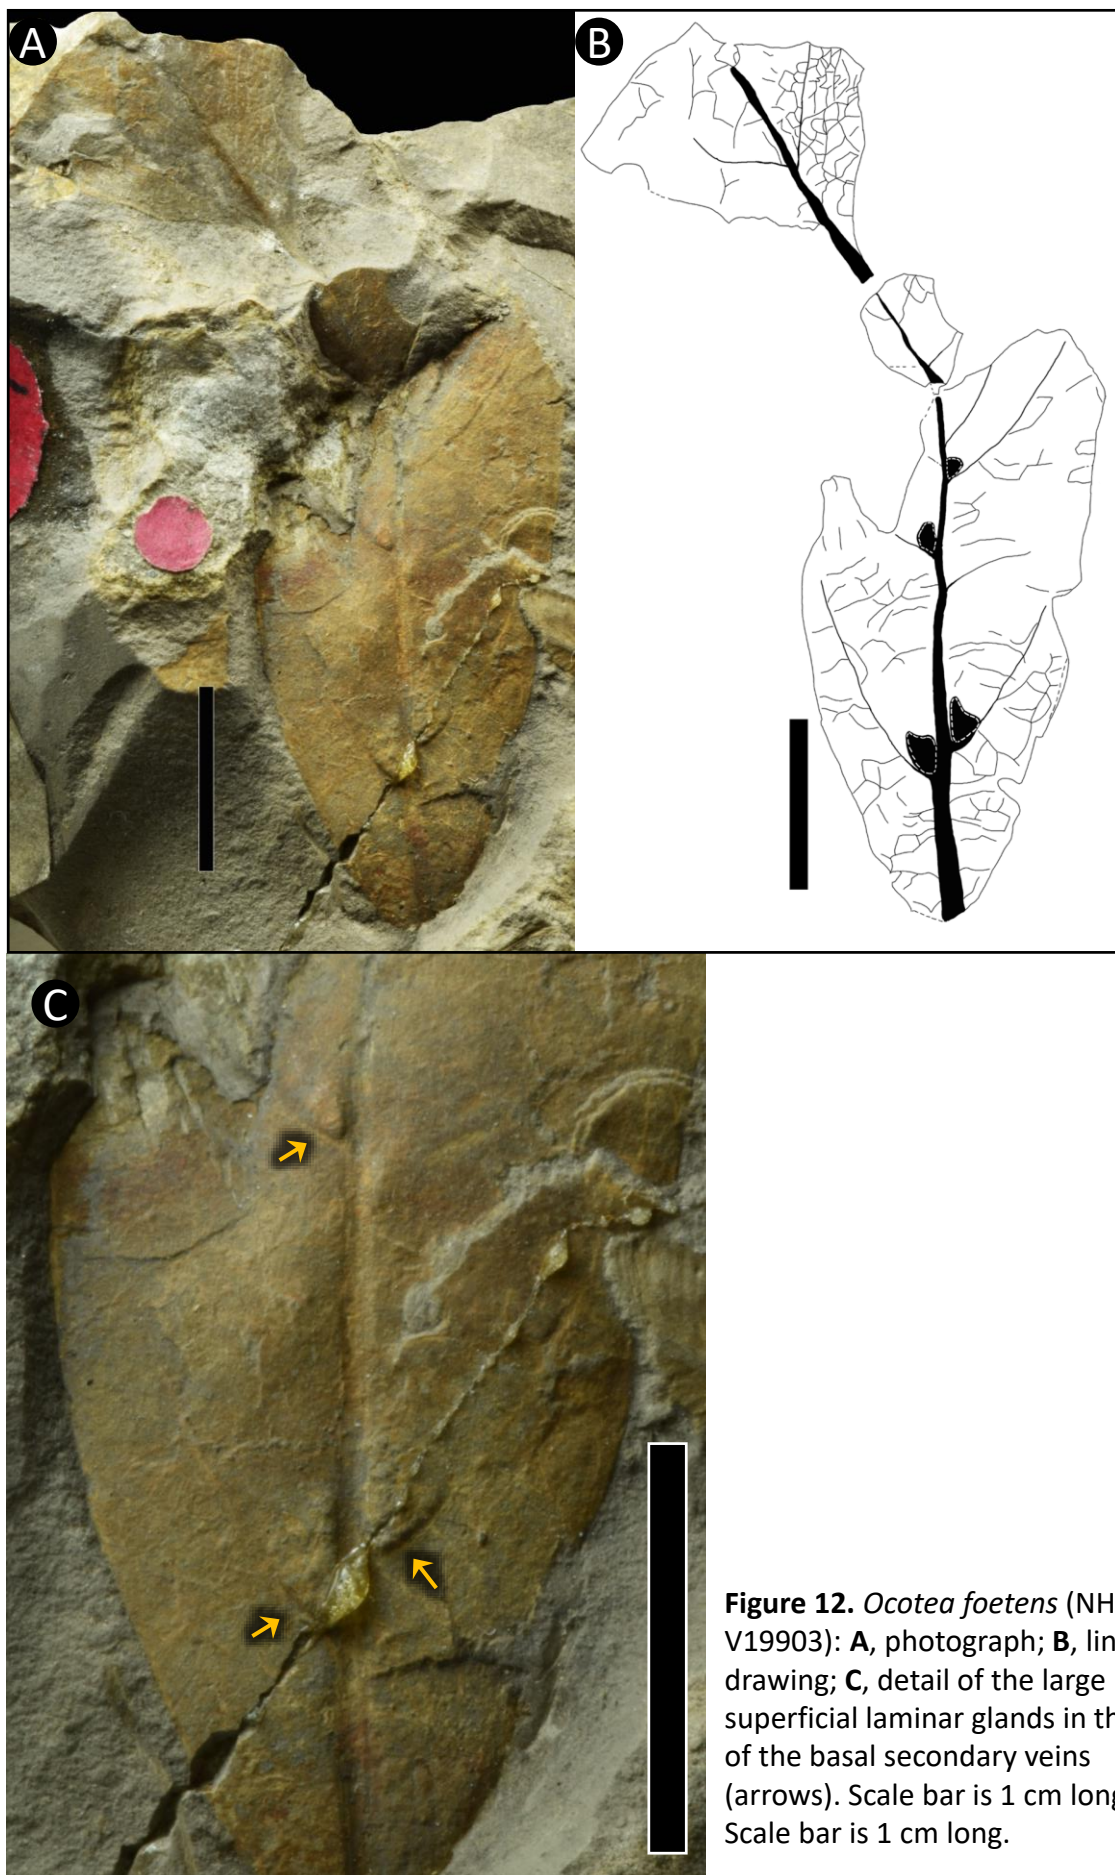

**Figure 12.** *Ocotea foetens* (NHMUK V19903): **A**, photograph; **B**, line drawing; **C**, detail of the large superficial laminar glands in the axil of the basal secondary veins (arrows). Scale bar is 1 cm long. Scale bar is 1 cm long.



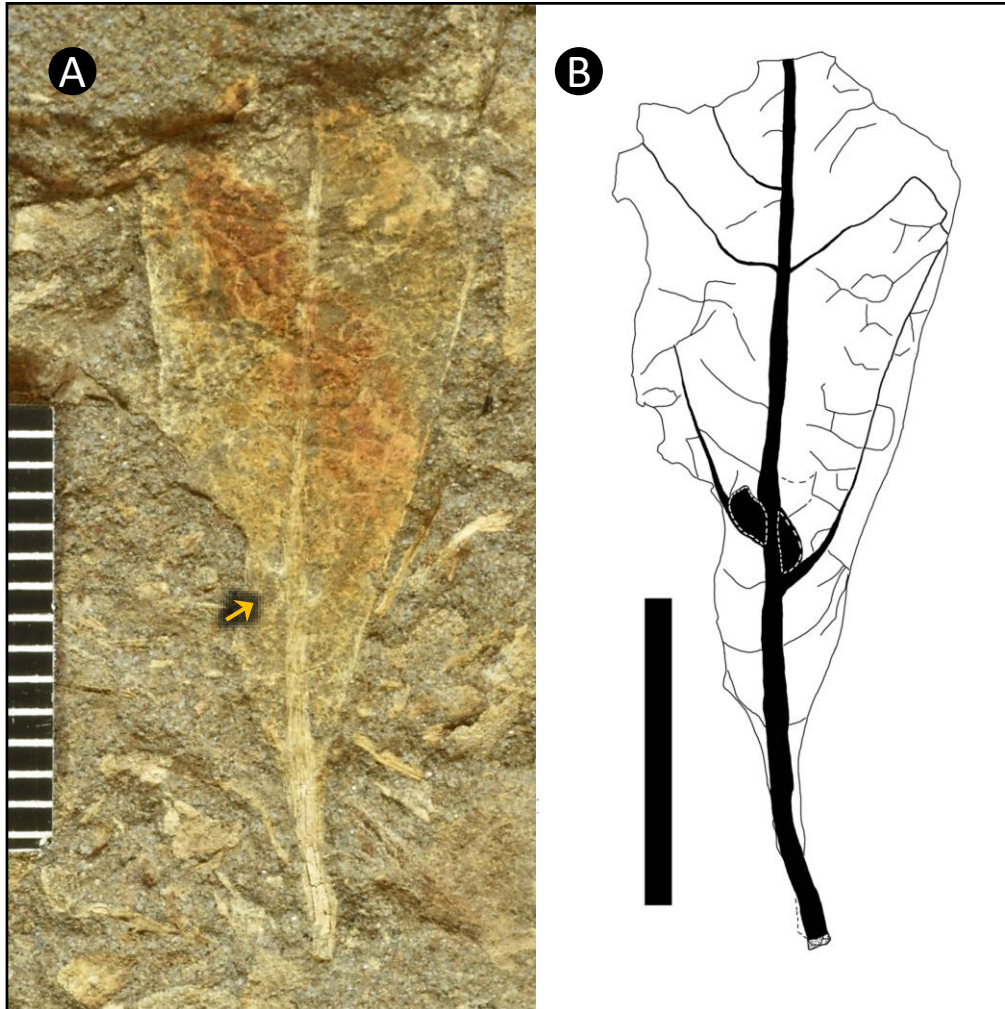

**Figure 13.** *Ocotea foetens* (NHMUK V19907): **A**, photograph; **B**, line drawing; arrow indicates the position of the large superficial laminar glands in the axil of the most basal secondary veins. Scale bar in **A**, is divided in mm; Scale bar in **B**, is 1 cm long.

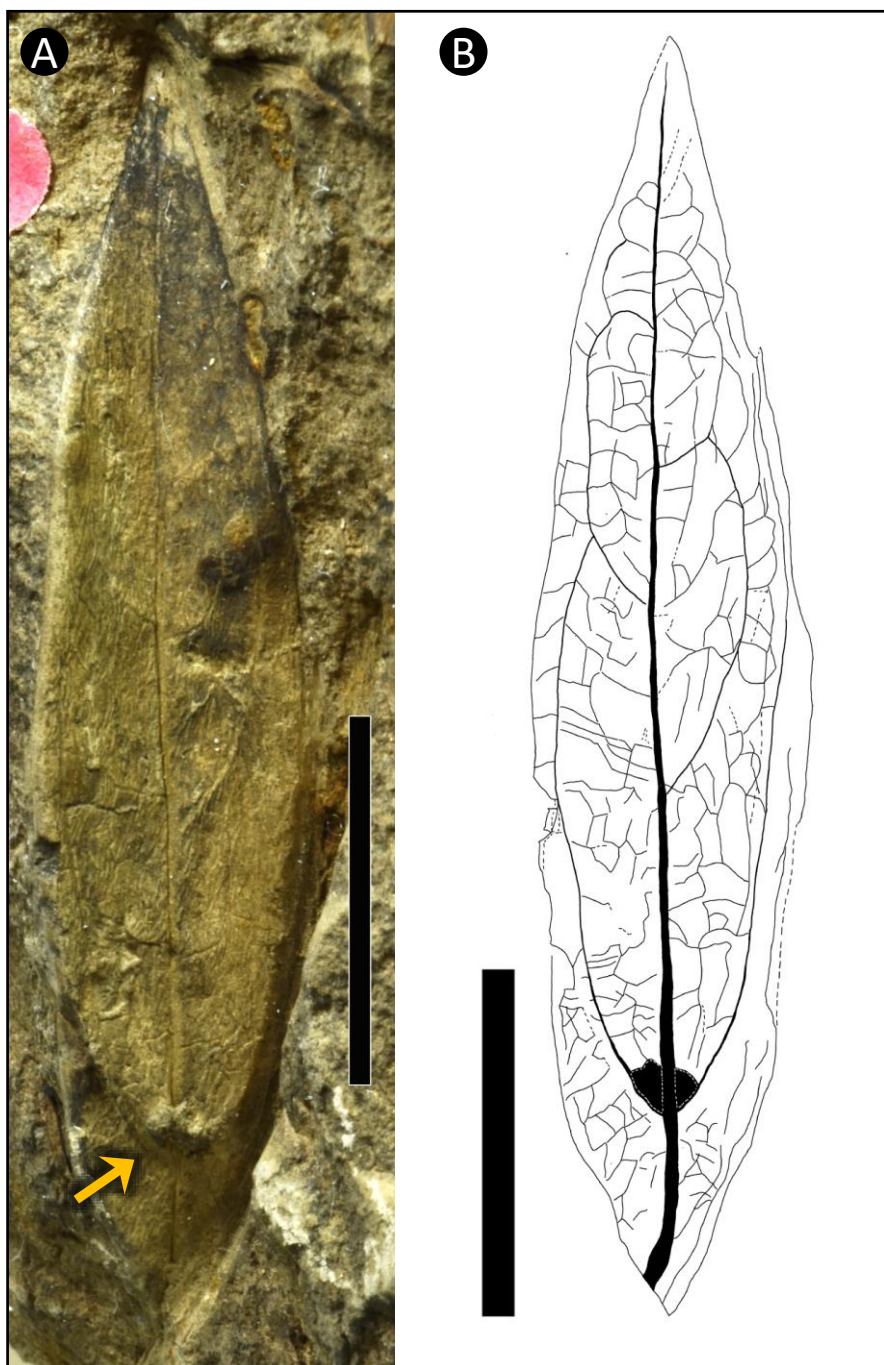

**Figure 14.** *Ocotea foetens* (NHMUK V19919): **A**, photograph; **B**, line drawing; arrow indicates the position of the large superficial laminar glands in the axil of the most basal secondary veins. Scale bars are 1 cm long.

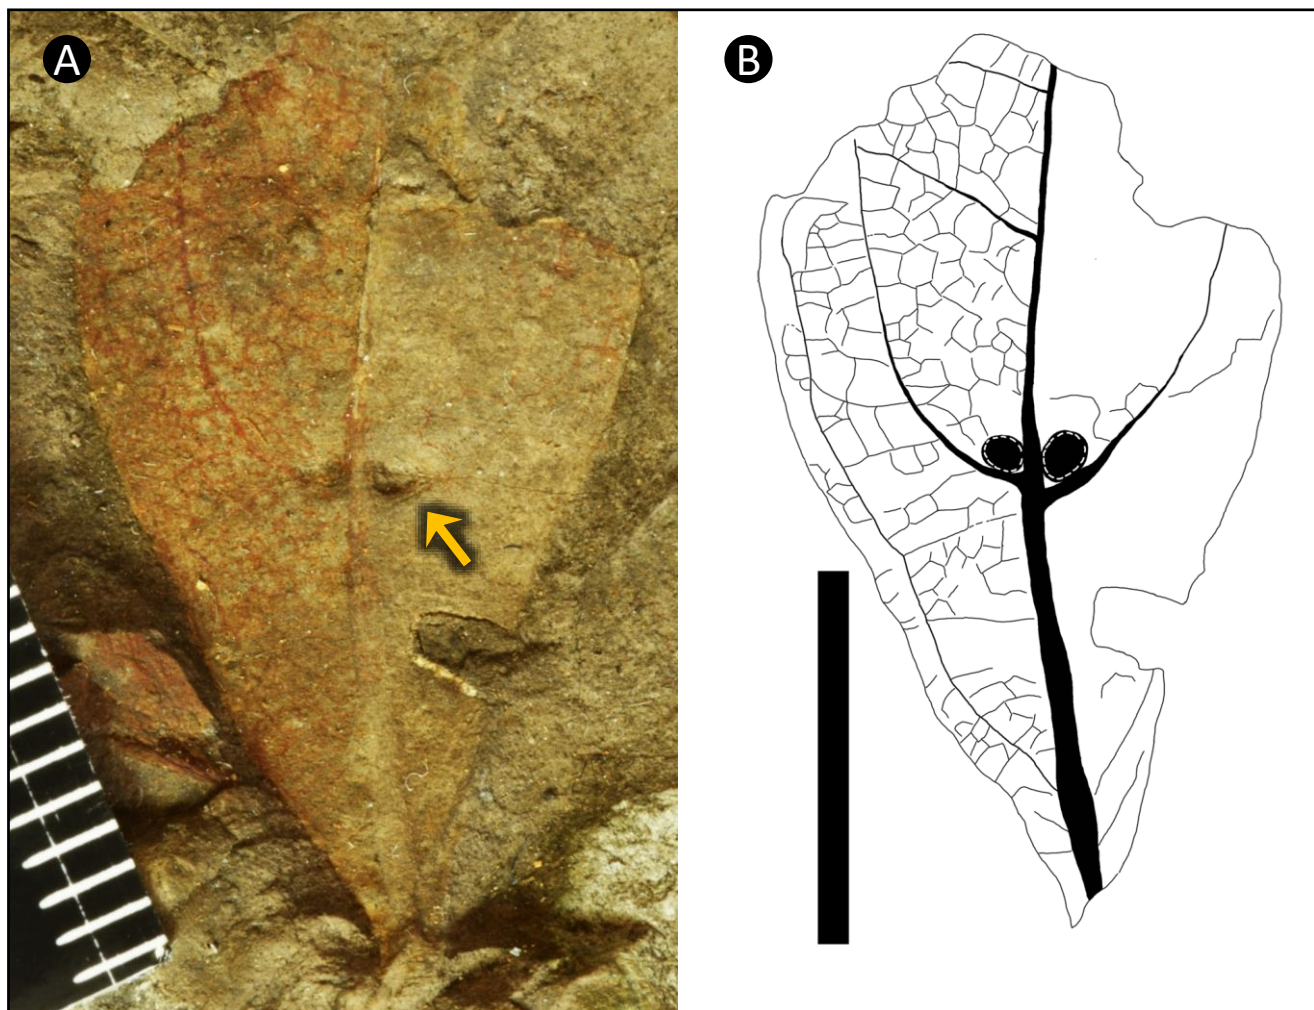

**Figure 15.** *Ocotea foetens* (NHMUK V19904). **A**, photograph; **B**, line drawing; Arrow indicates the position of the large superficial laminar glands in the axil of the most basal secondary veins. Scale bar in **A**, is divided in mm; scale bar in **B**, is 1 cm long.



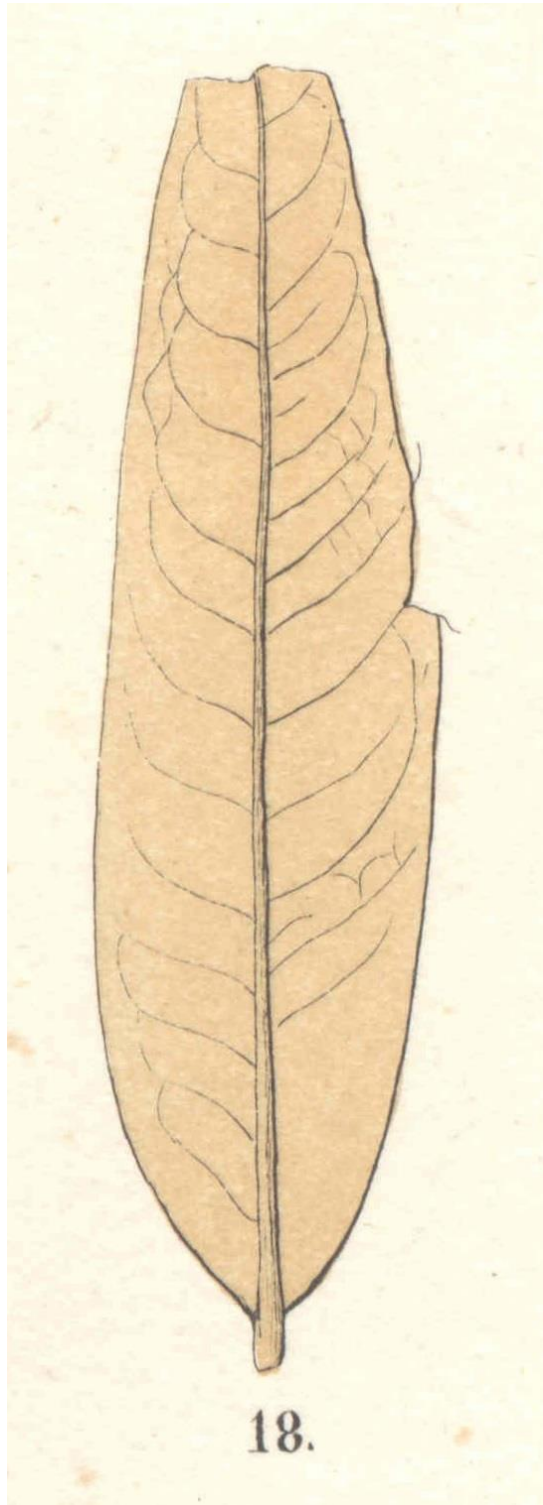

**Figure 16.** *Salix* sp.: Line drawing by Heer (1857, pl. I, fig. 18). This specimen is presently missing from the ETH collection.

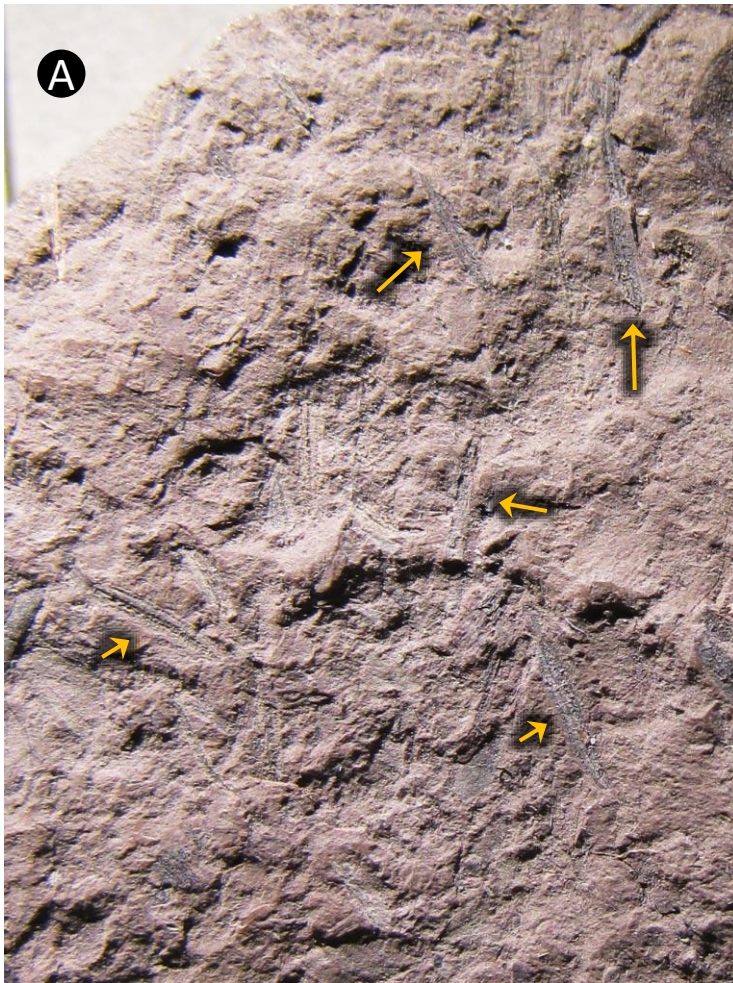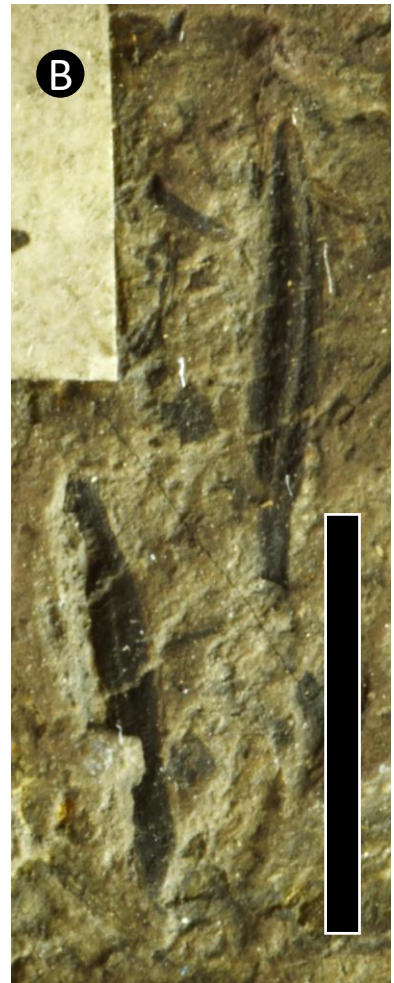

**Figure 17.** *Erica arborea*: **A**, ETH-Z-ERDW 5464 showing several leaves (arrows); **B**, NHMUK V 19912 photographic detail. Scale bar is 1 cm long



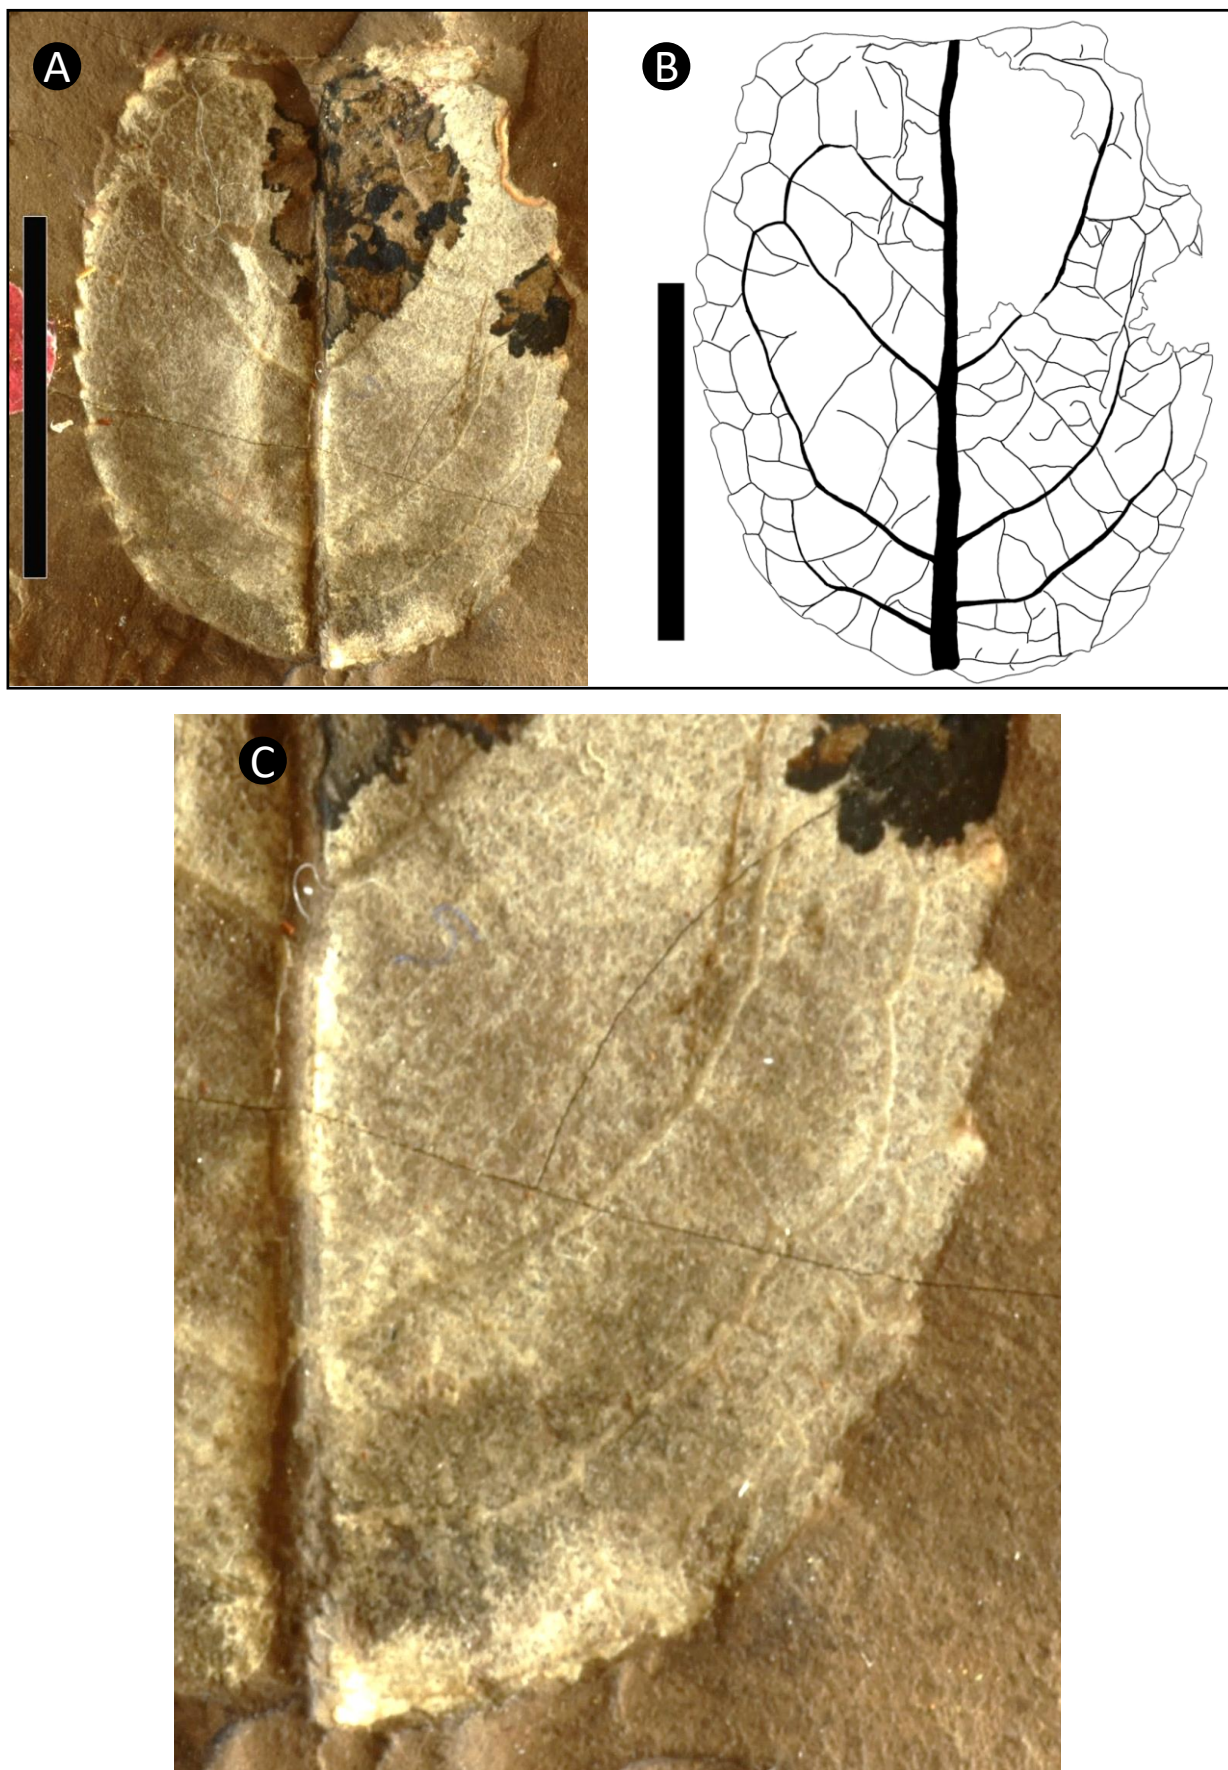

**Figure 18.** cf. *Vaccinium* (NHMUK V19911): **A**, photograph; **B**, line drawing; **C**, detail of the venation and the toothed margin. Scale bars are 1 cm long.



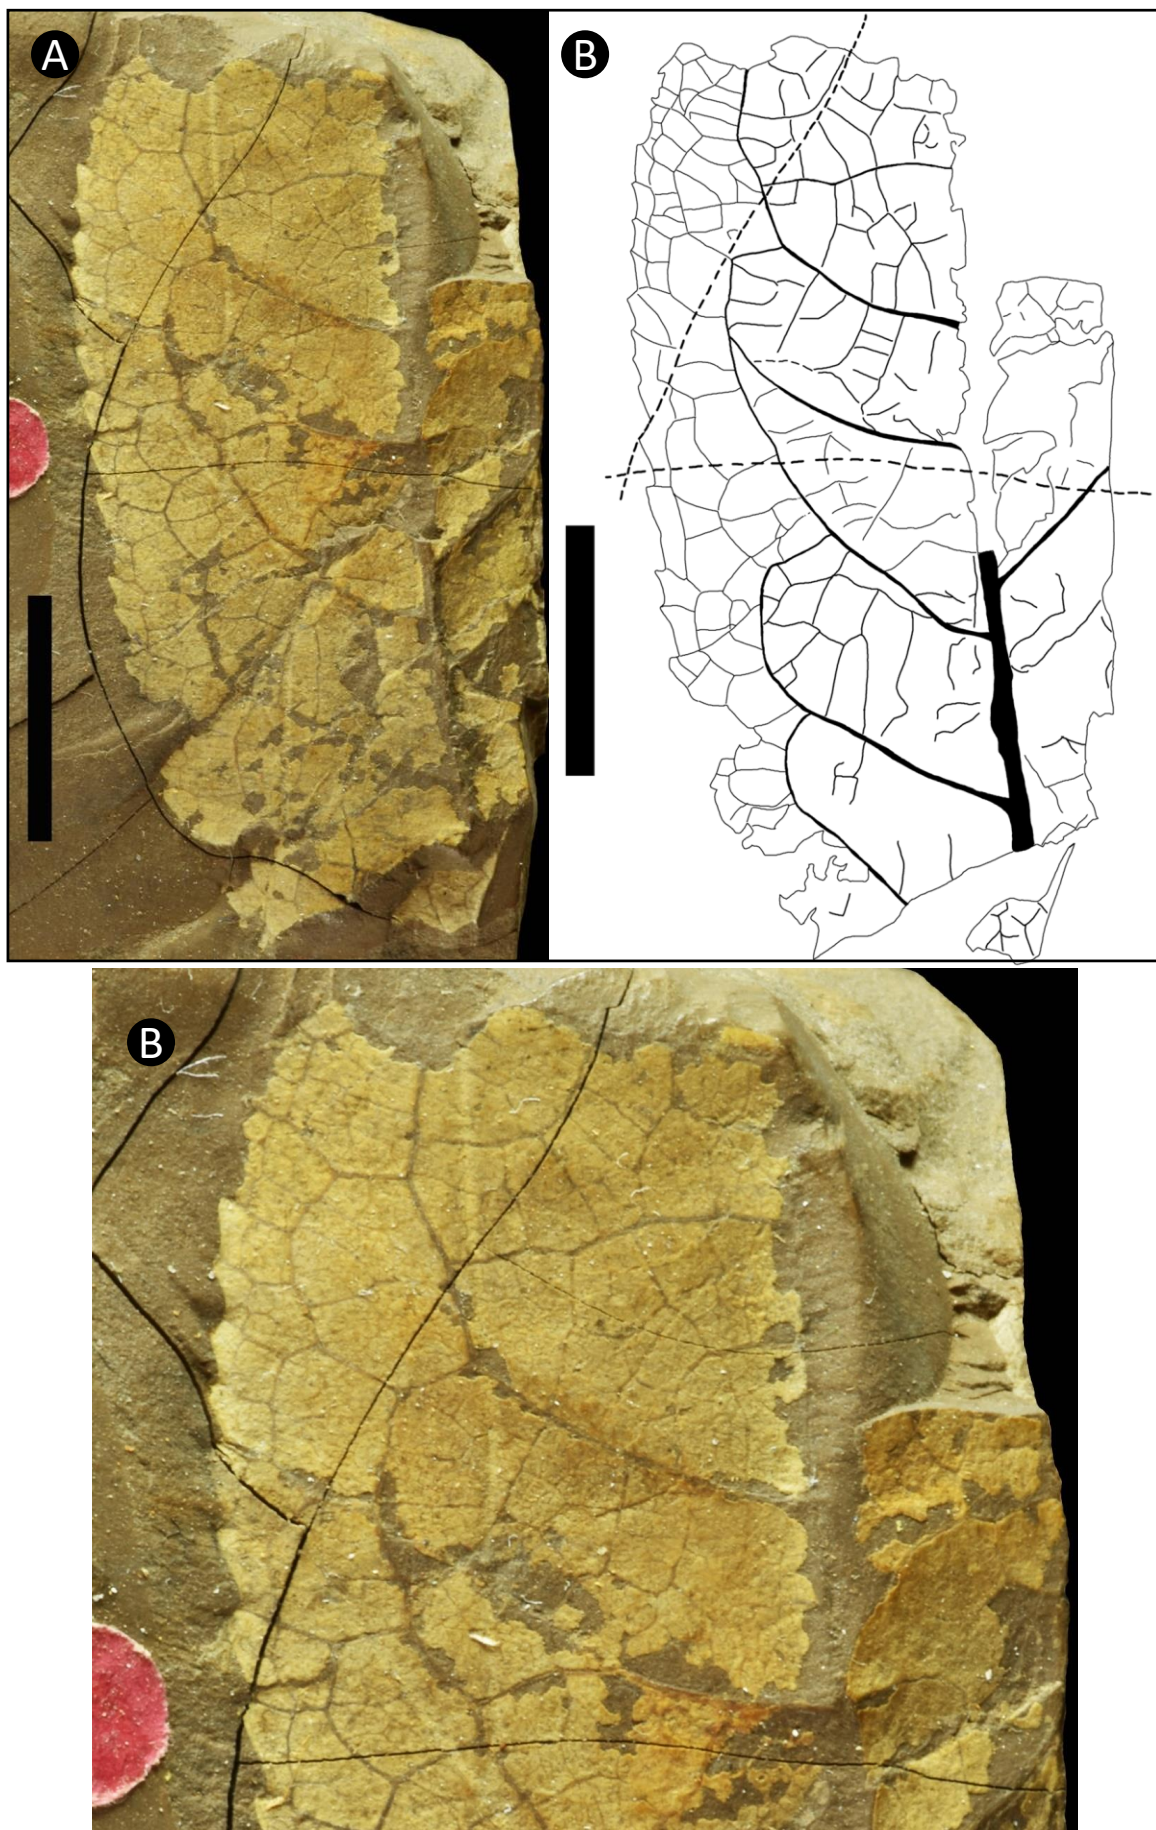

**Figure 19.** cf. *Vaccinium*: (NHMUK 19910): **A**, photograph; **B**, line drawing; **C**, detail of the venation and the toothed margin Scale bar is 1 cm long.



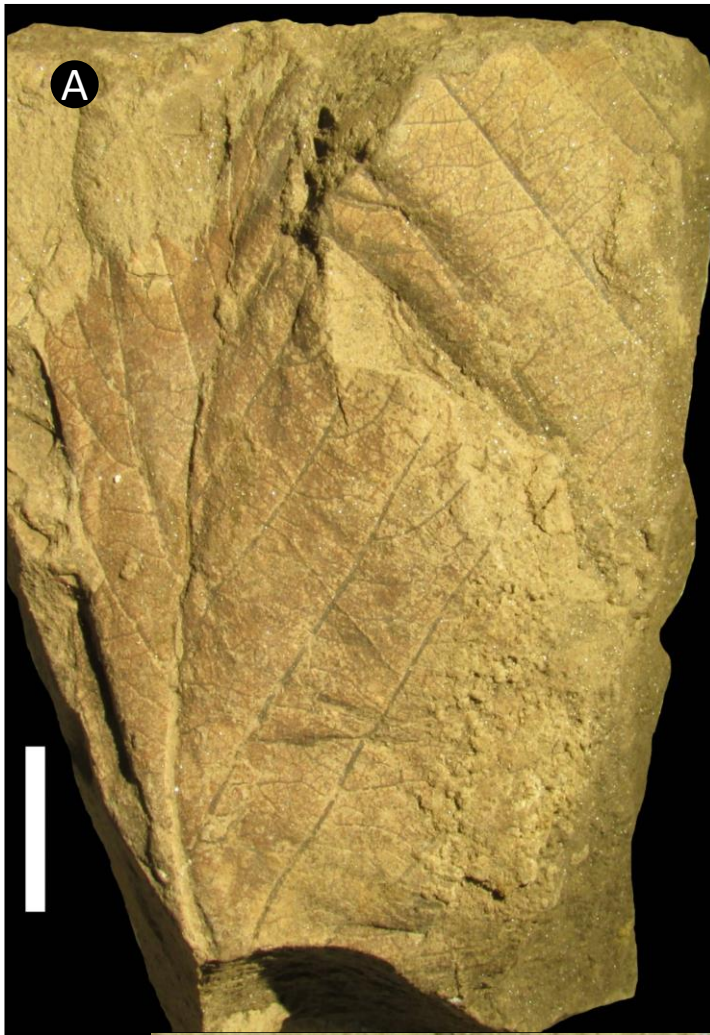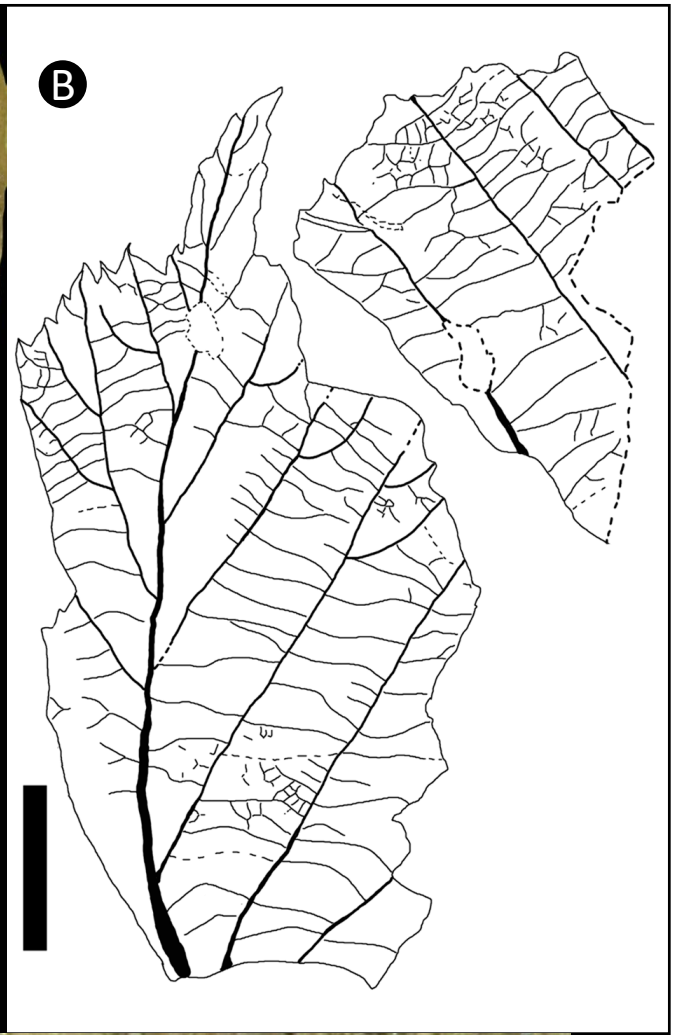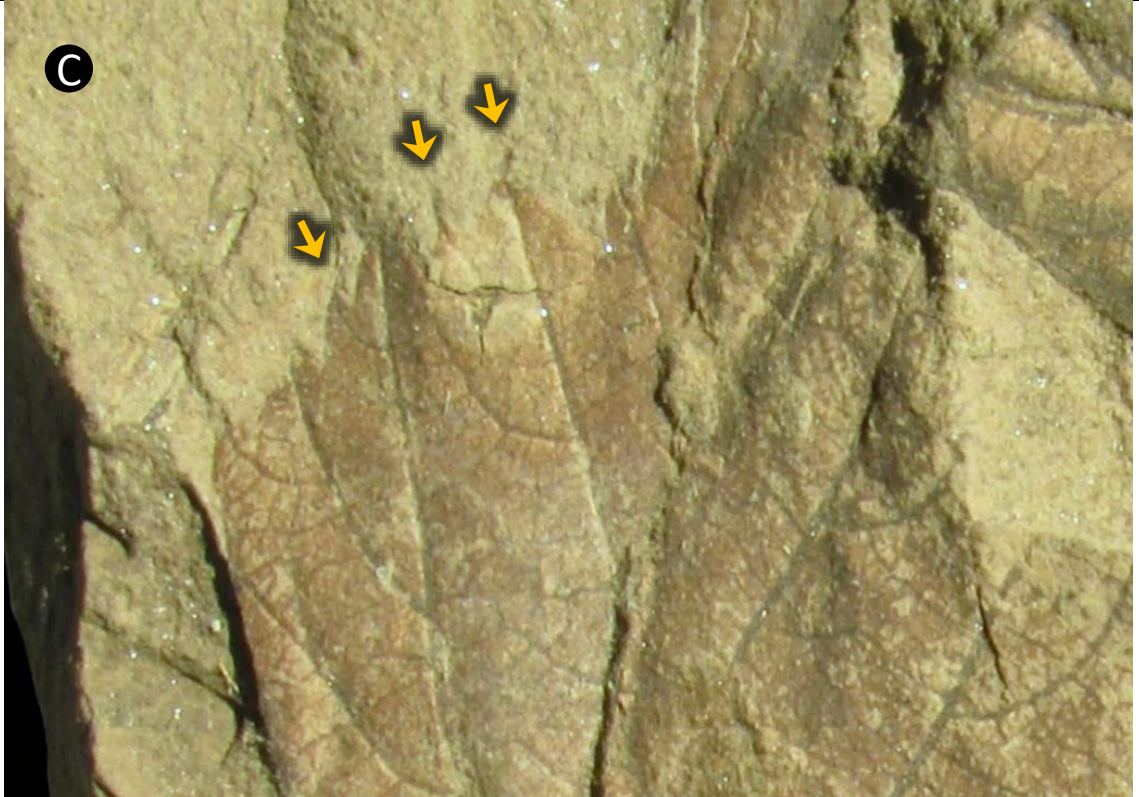

**Figure 20.** *Rubus* sp. (ETH 3708): **A**, photograph; **B**, line drawing; **C**, Detail of the venation and the toothed margin. Scale bar is 1 cm long.

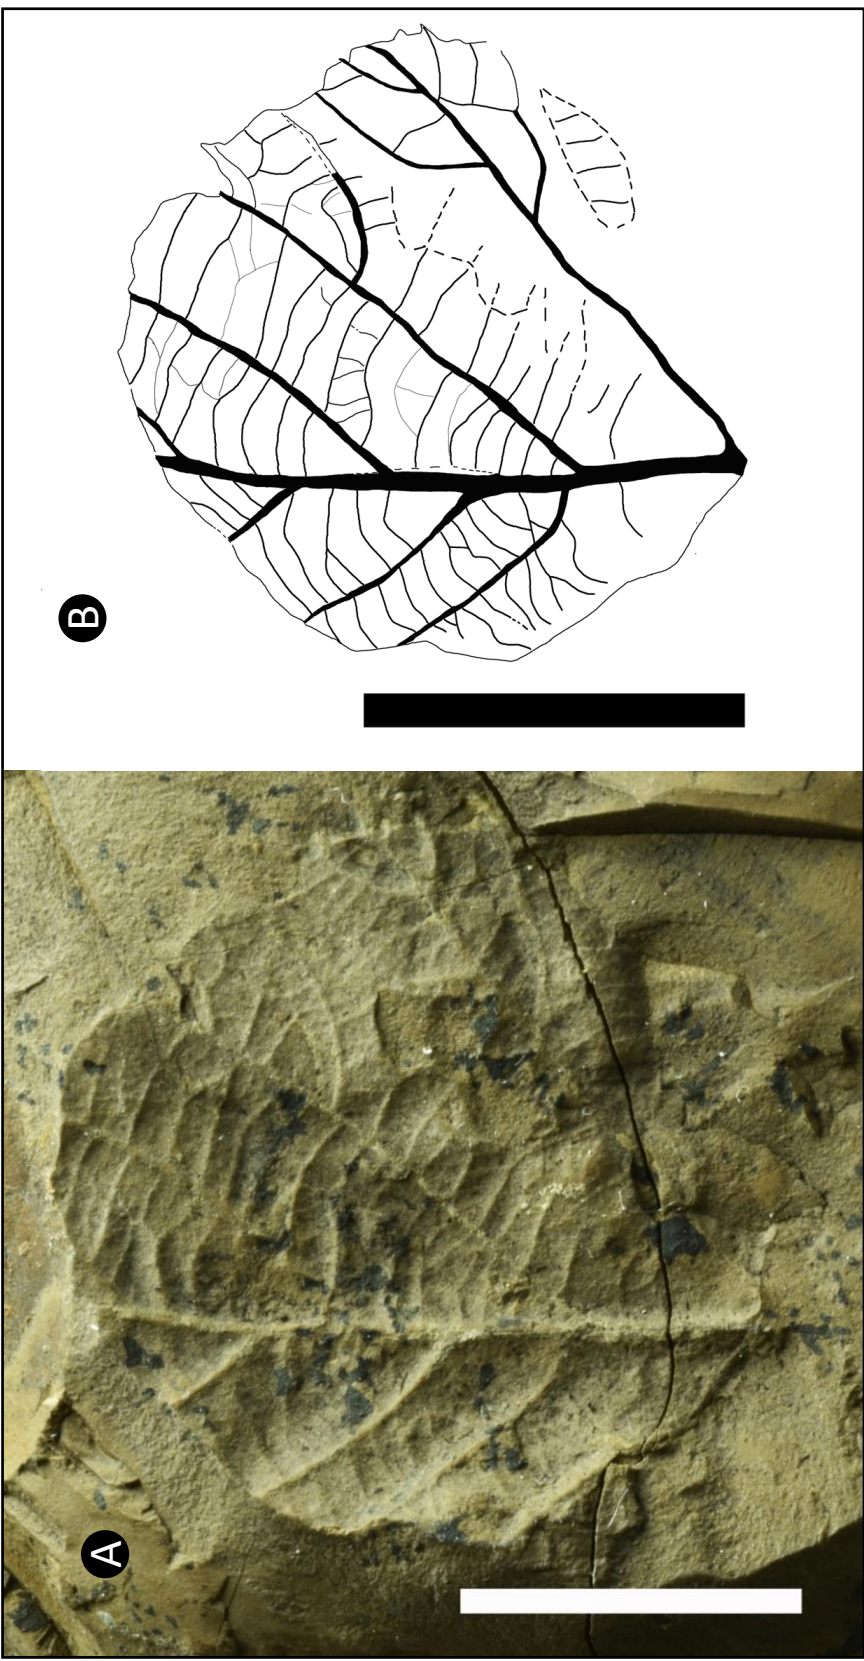

**Figure 21.** *Rubus* sp. (NHMUK V19902): **A**, photograph; **B**, line drawing; Scale bar is 1 cm long.



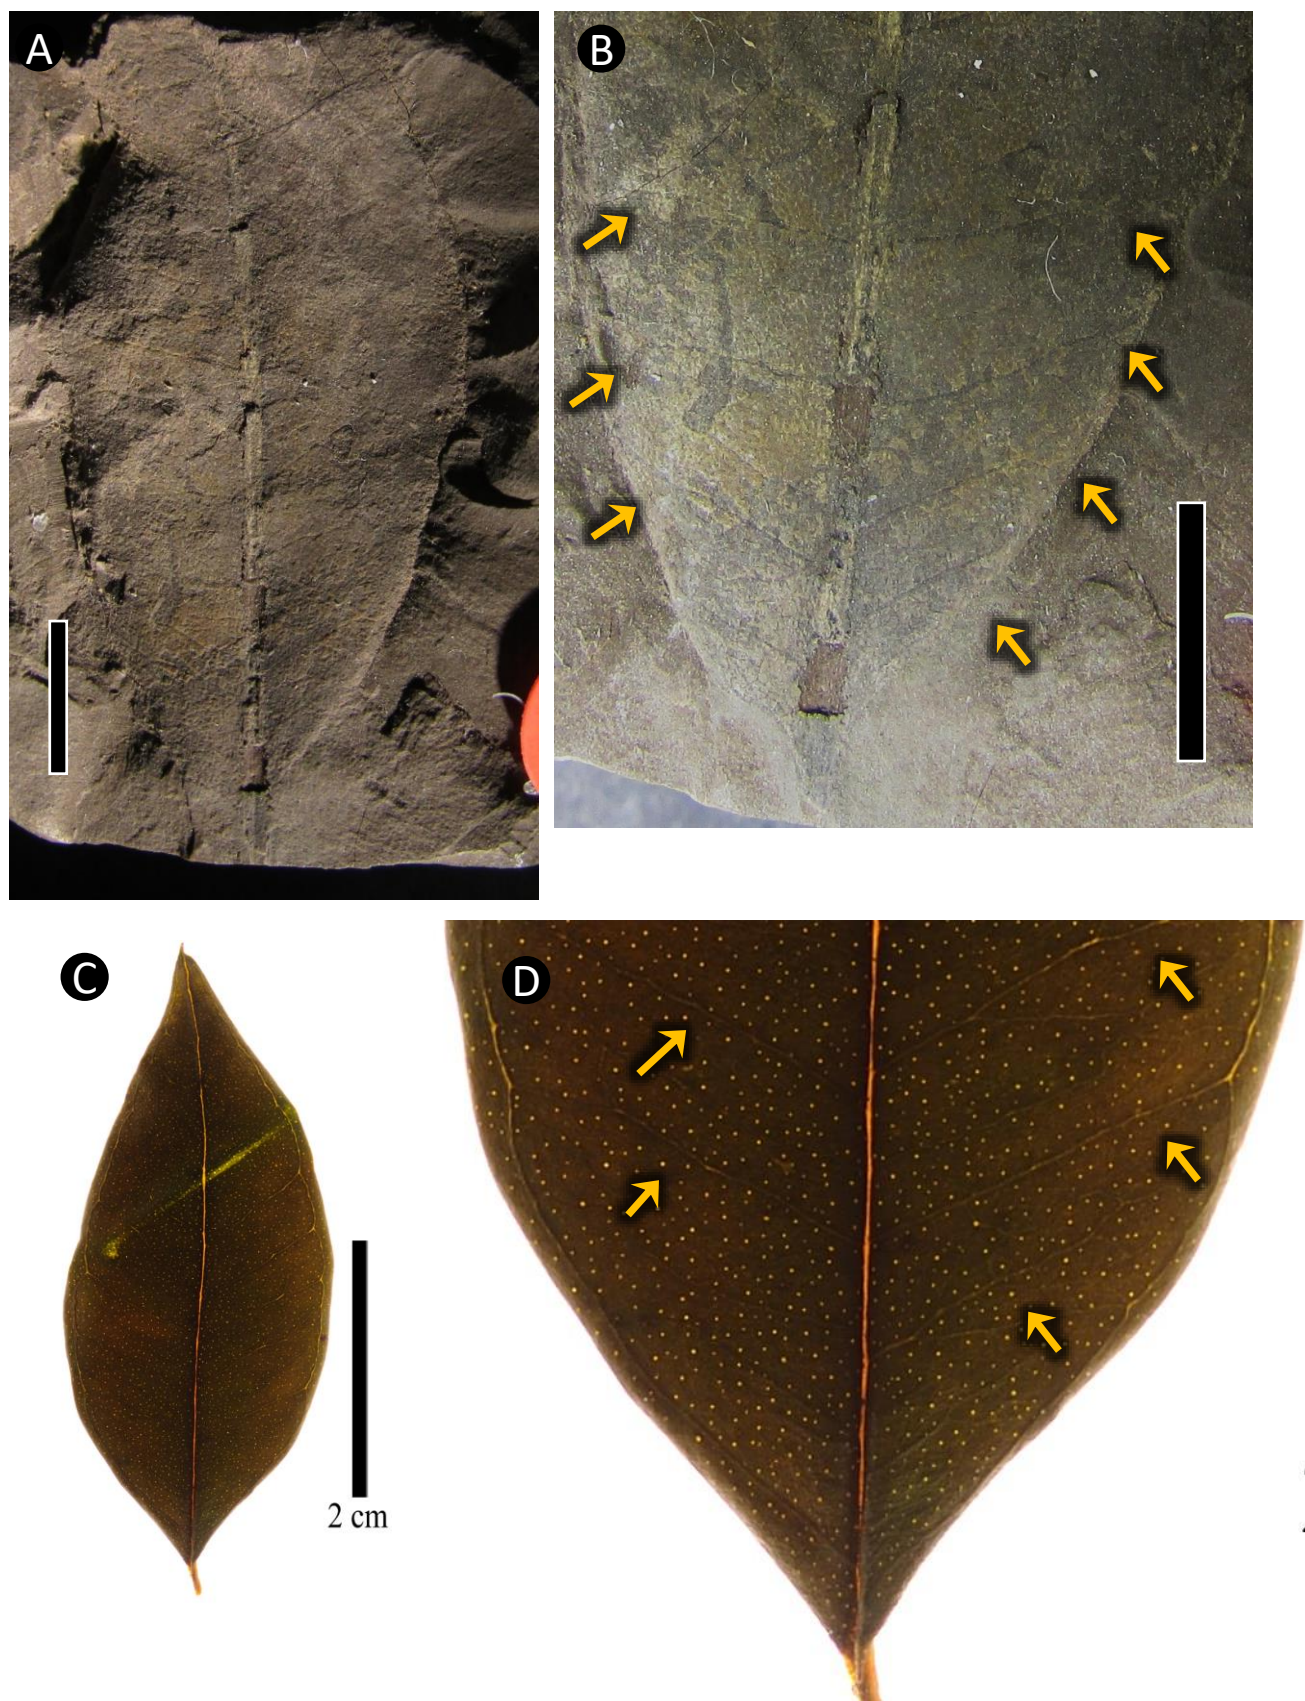

**Figure 22.** cf. *Myrtus*: (ETH-Z-ERDW 5465): **A**, photograph; **B**, detail of the venation; **C**, leaf of *Myrtus communis*; **D**, detail of the primary and secondary venation of *M. communis*, showing similarities to the specimen ETH-Z-ERDW 5465. Scale bars are 1 cm long, except in Fig. C.



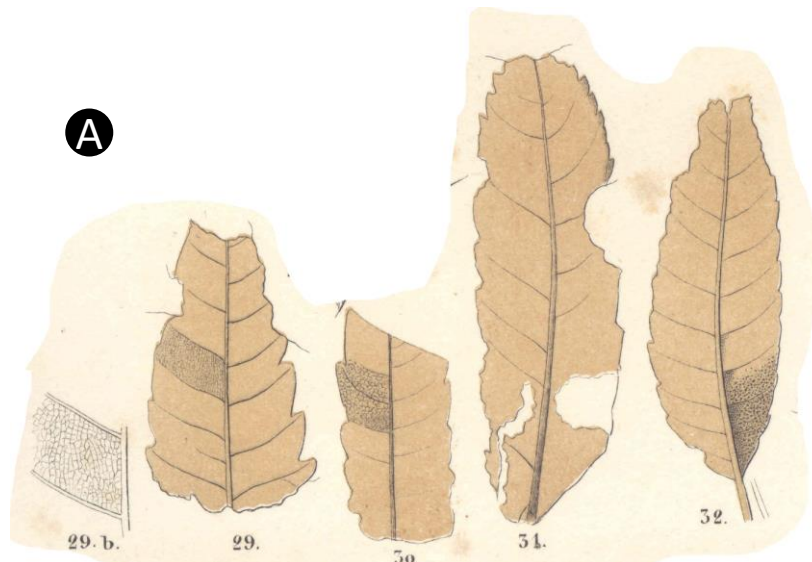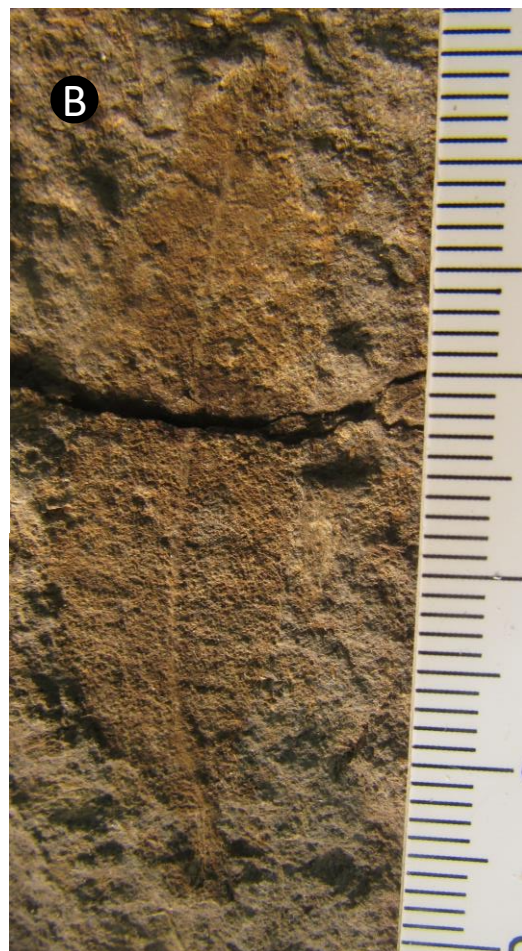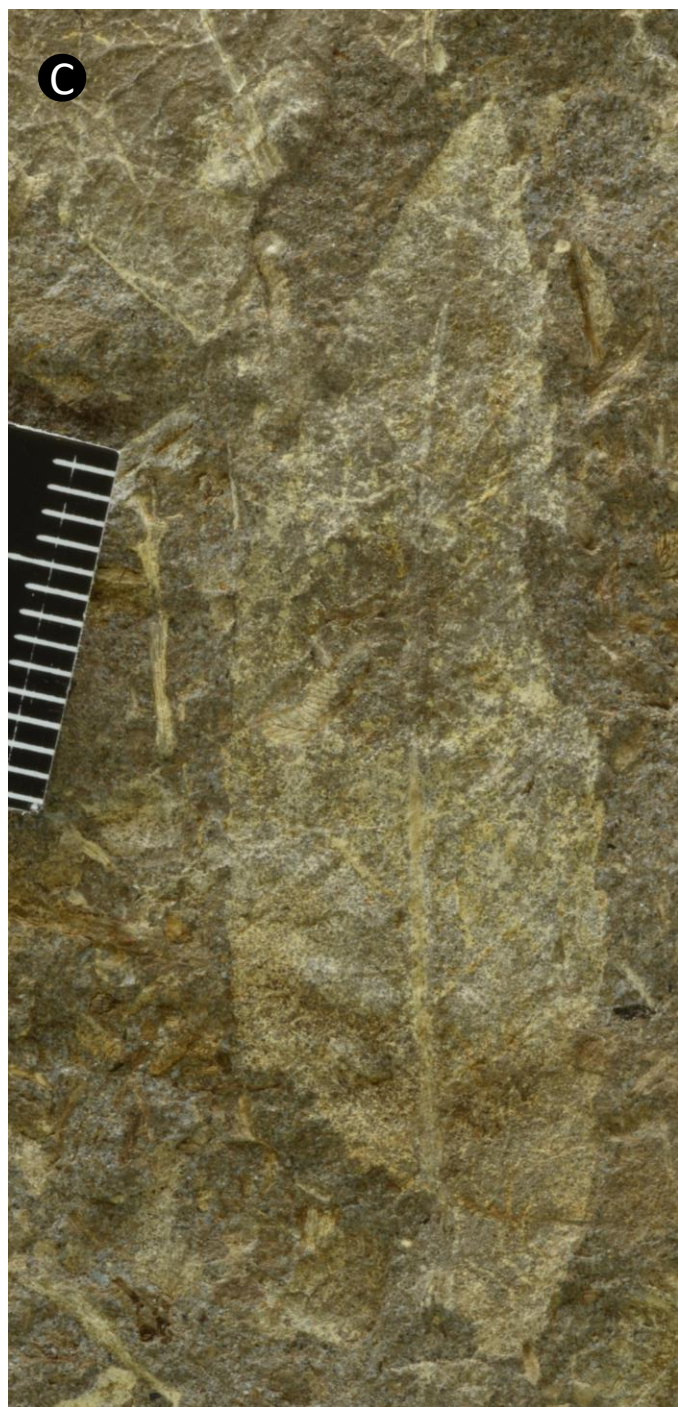

**Figure 23.** Magnoliopsida gen. et. sp. indet 1: **A**, line drawing by Heer (1857, pl. II, figs. 29-32); **B**, ETH-Z-ERDW 5482 (compare with Fig. A, n° 32); **C**, NHMUK V19907, showing similar morphology.



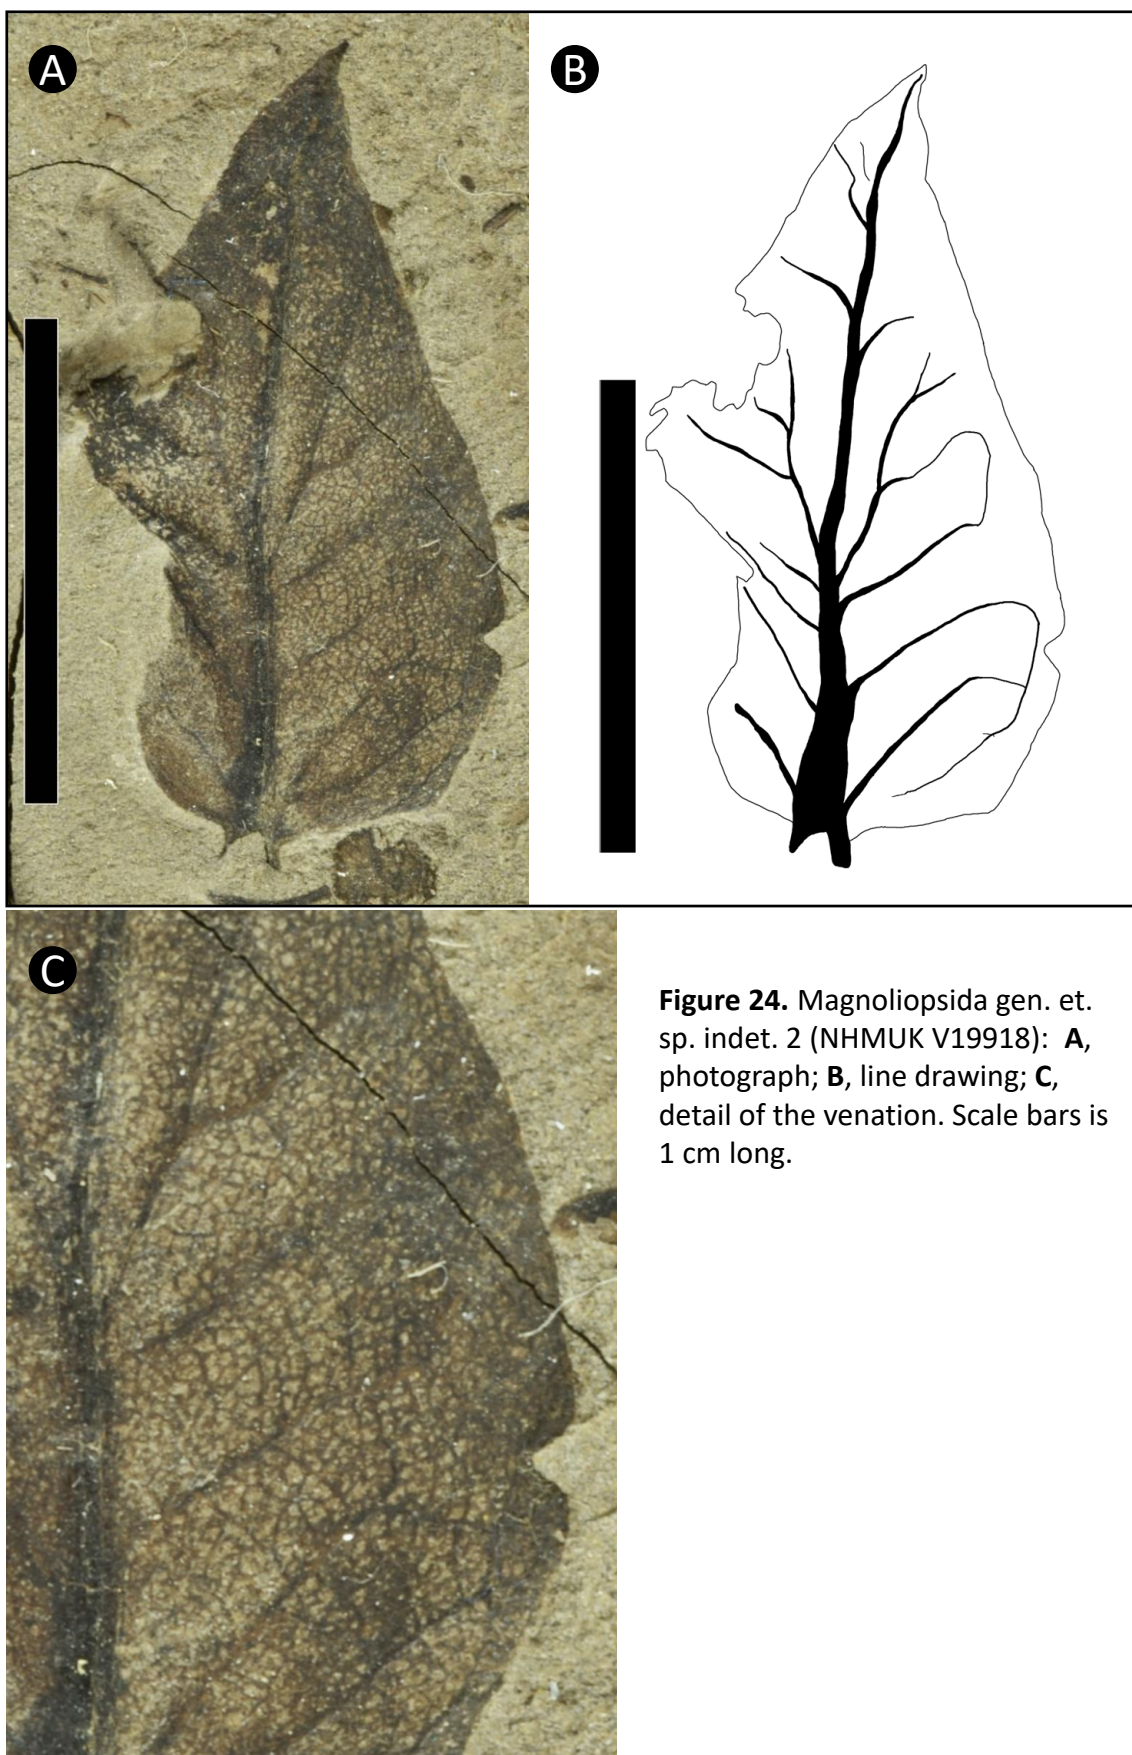

**Figure 24.** Magnoliopsida gen. et. sp. indet. 2 (NHMUK V19918): **A**, photograph; **B**, line drawing; **C**, detail of the venation. Scale bars is 1 cm long.

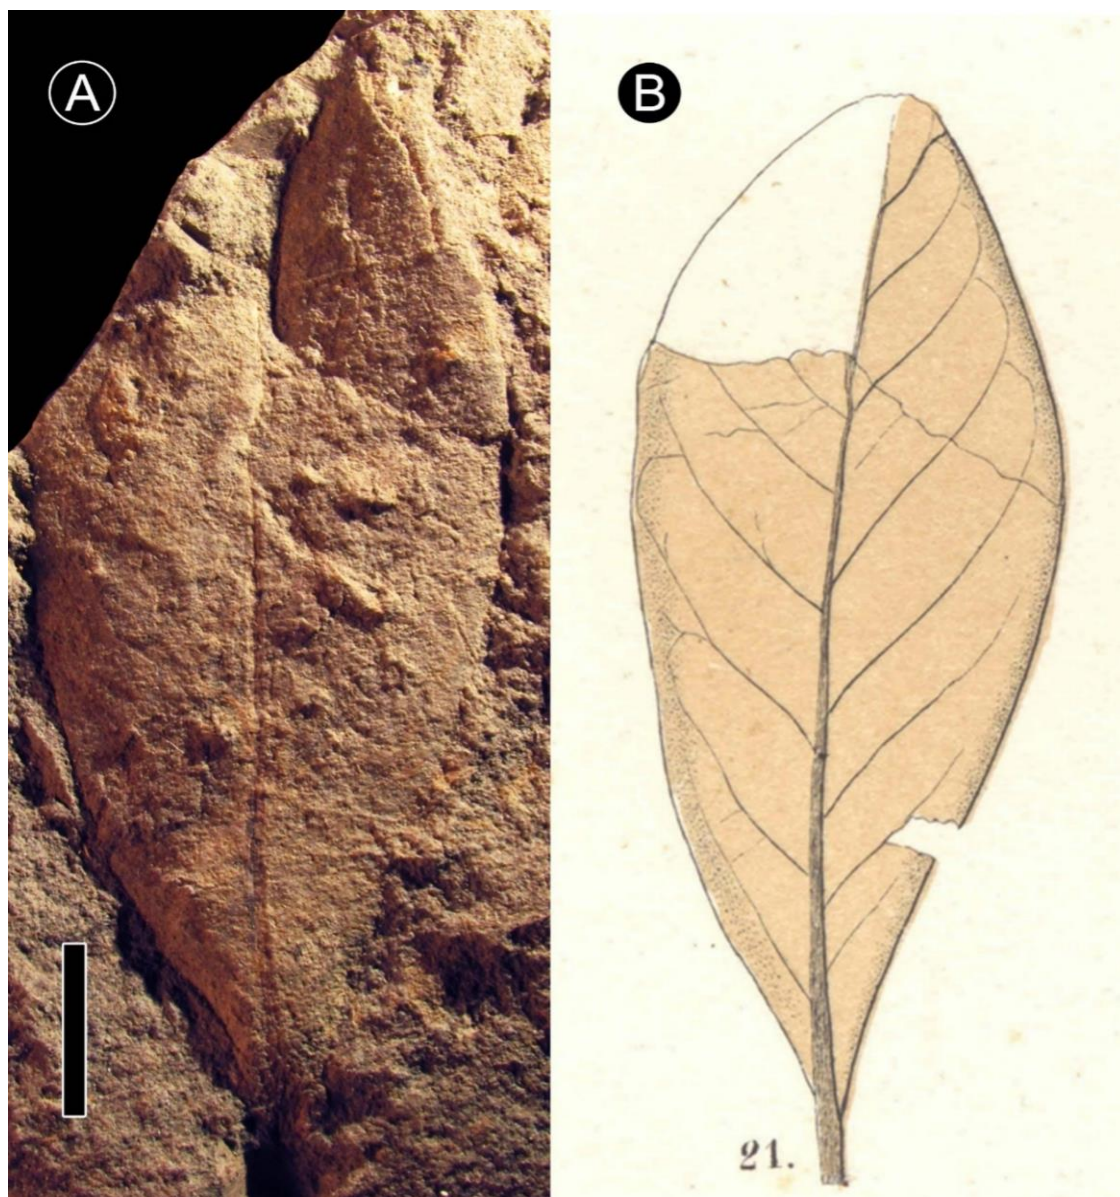

**Figure 25.** Magnoliopsida gen. et. sp. indet 3 (ETH-Z-ERDW 2842a): **A**, photograph of the specimen; **B**, line drawing by Heer (1857, pl. I, fig.21).



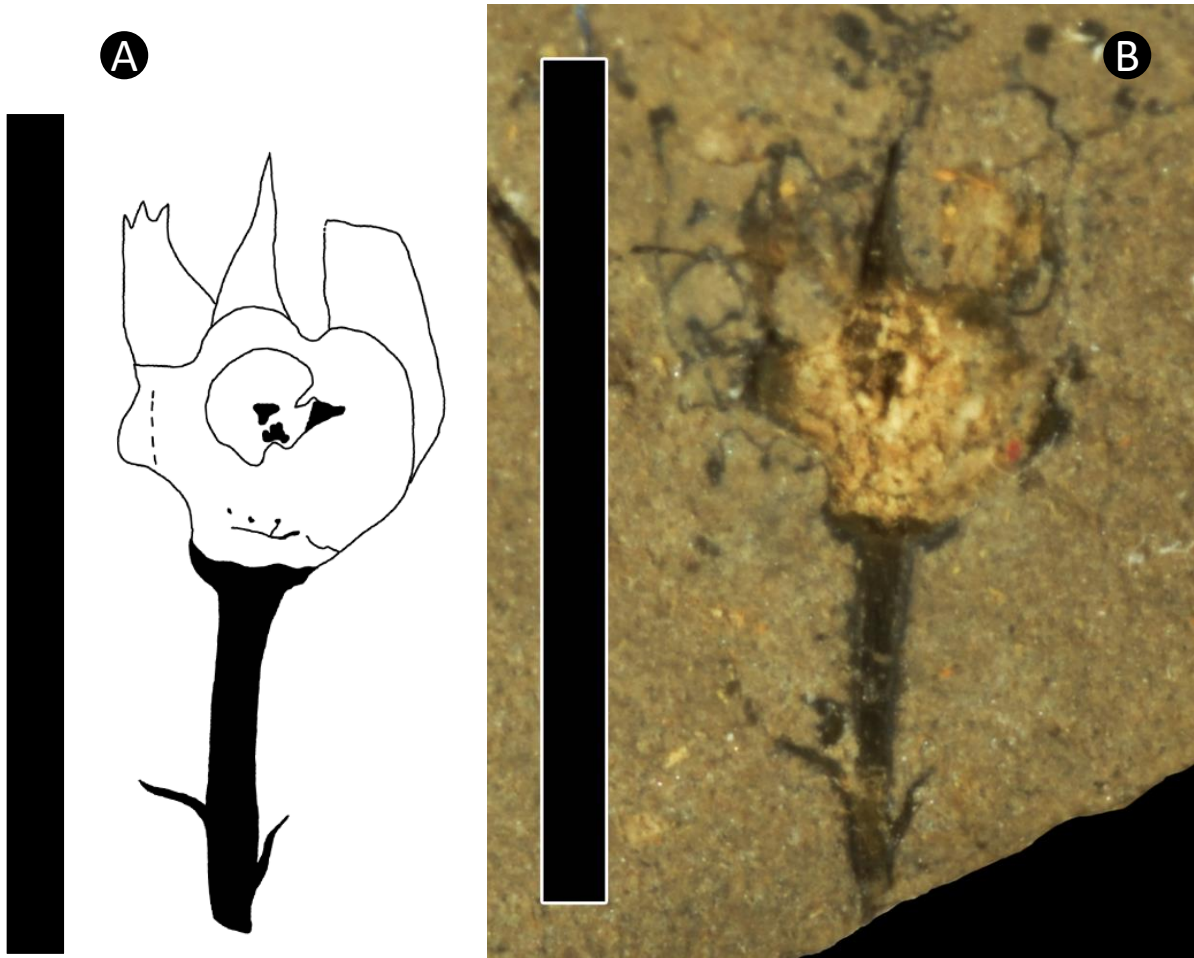

**Figure 26.** Magnoliopsida gen. et. sp. indet 4 (NHMUK V19898), a probable flower or fruit: **A**, line drawing; **B**, photograph of the specimen.

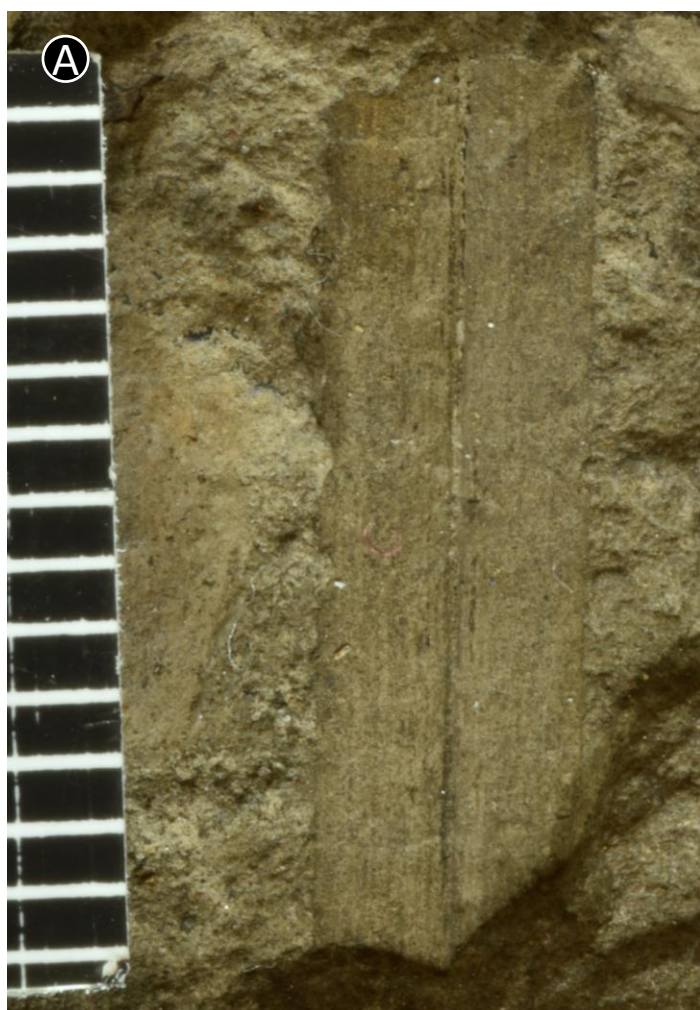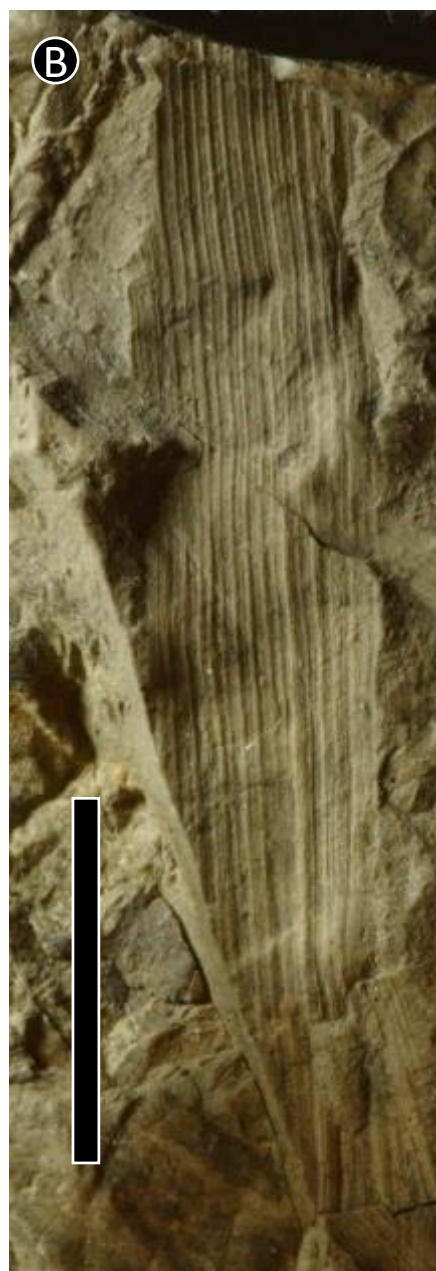

**Figure 27.** *Liliopsida* gen. et. sp. indet. 1: **A**, photograph of NHMUK V19900 (scale divisions equal 1mm); **B**, photograph of NHMUK V19892 (scale bar 0.5cm).
