# Supplementary material
Source: publisher figshare collection journal article supplement (https://tandf.figshare.com/articles/dataset/_/5619658)
Supplement: Supplementary file 2 [file 1]

**Inventory and review of the Mio-Pleistocene São Jorge flora  
(Madeira Island, Portugal): palaeoecological and biogeographical  
implications**

Carlos A. Góis-Marques, José Madeira and  
Miguel Menezes de Sequeira

## **Supplementary Material 3**

Photographs of Indeterminable specimens

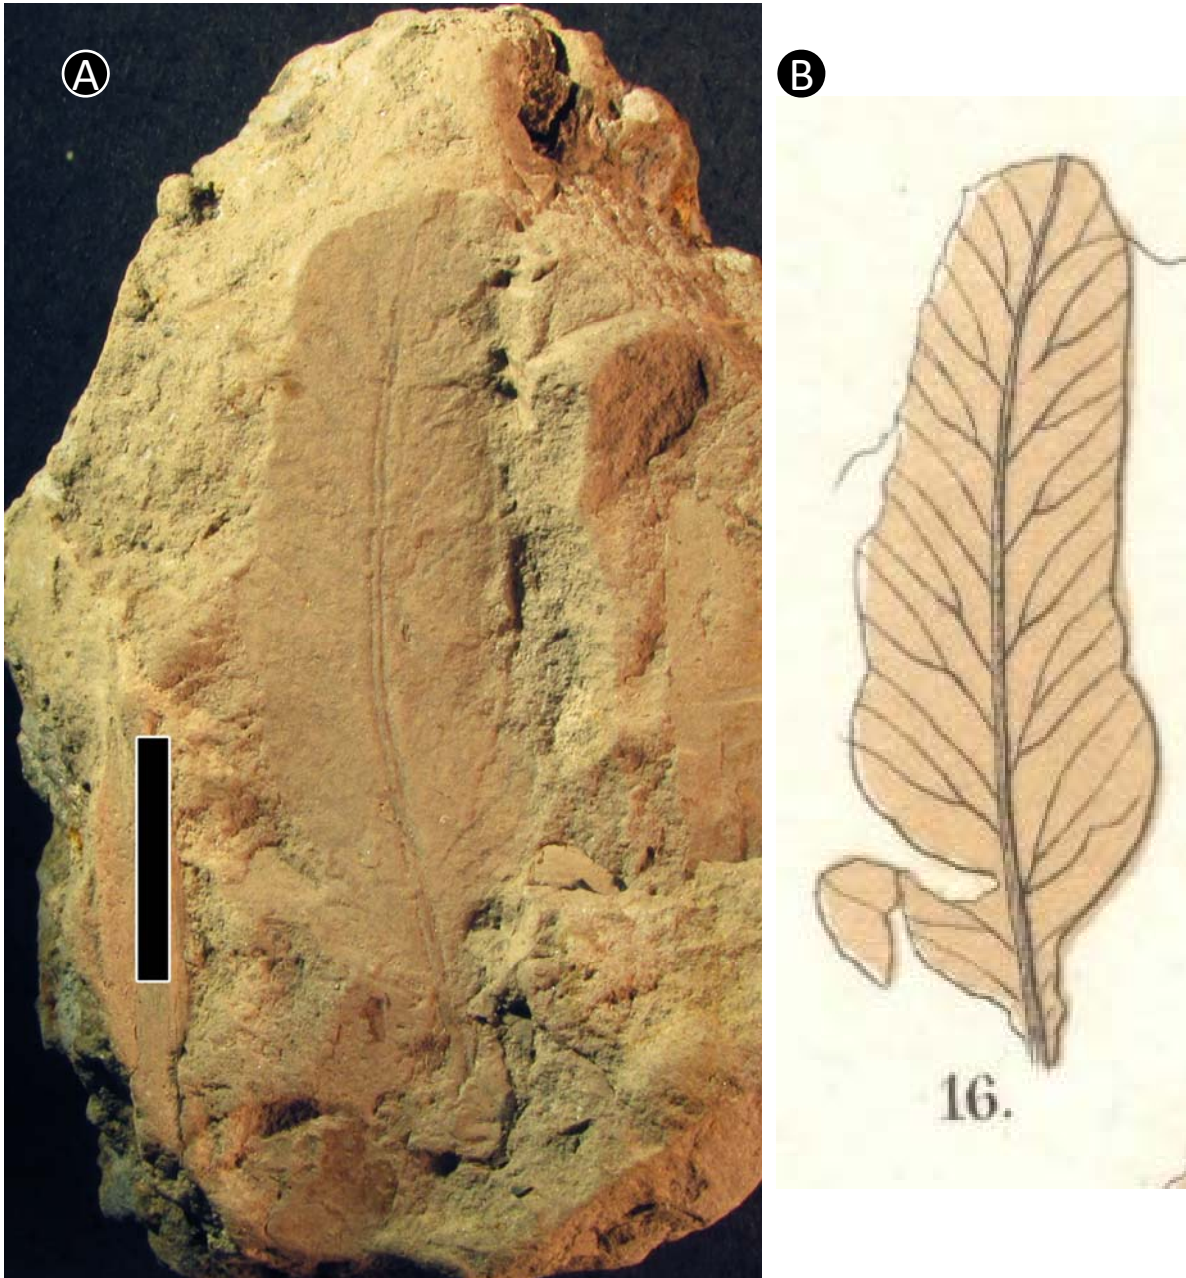

**Figure 1.** “*Asplenium marinum*” (ETH-Z-ERDW 2840) revised as *Filicopsida incertae sedis* 1: **A**, photograph of the specimen; **B**, line drawing published by Heer (1857; pl. I, fig. 16). Scale bar is 0.5cm long.

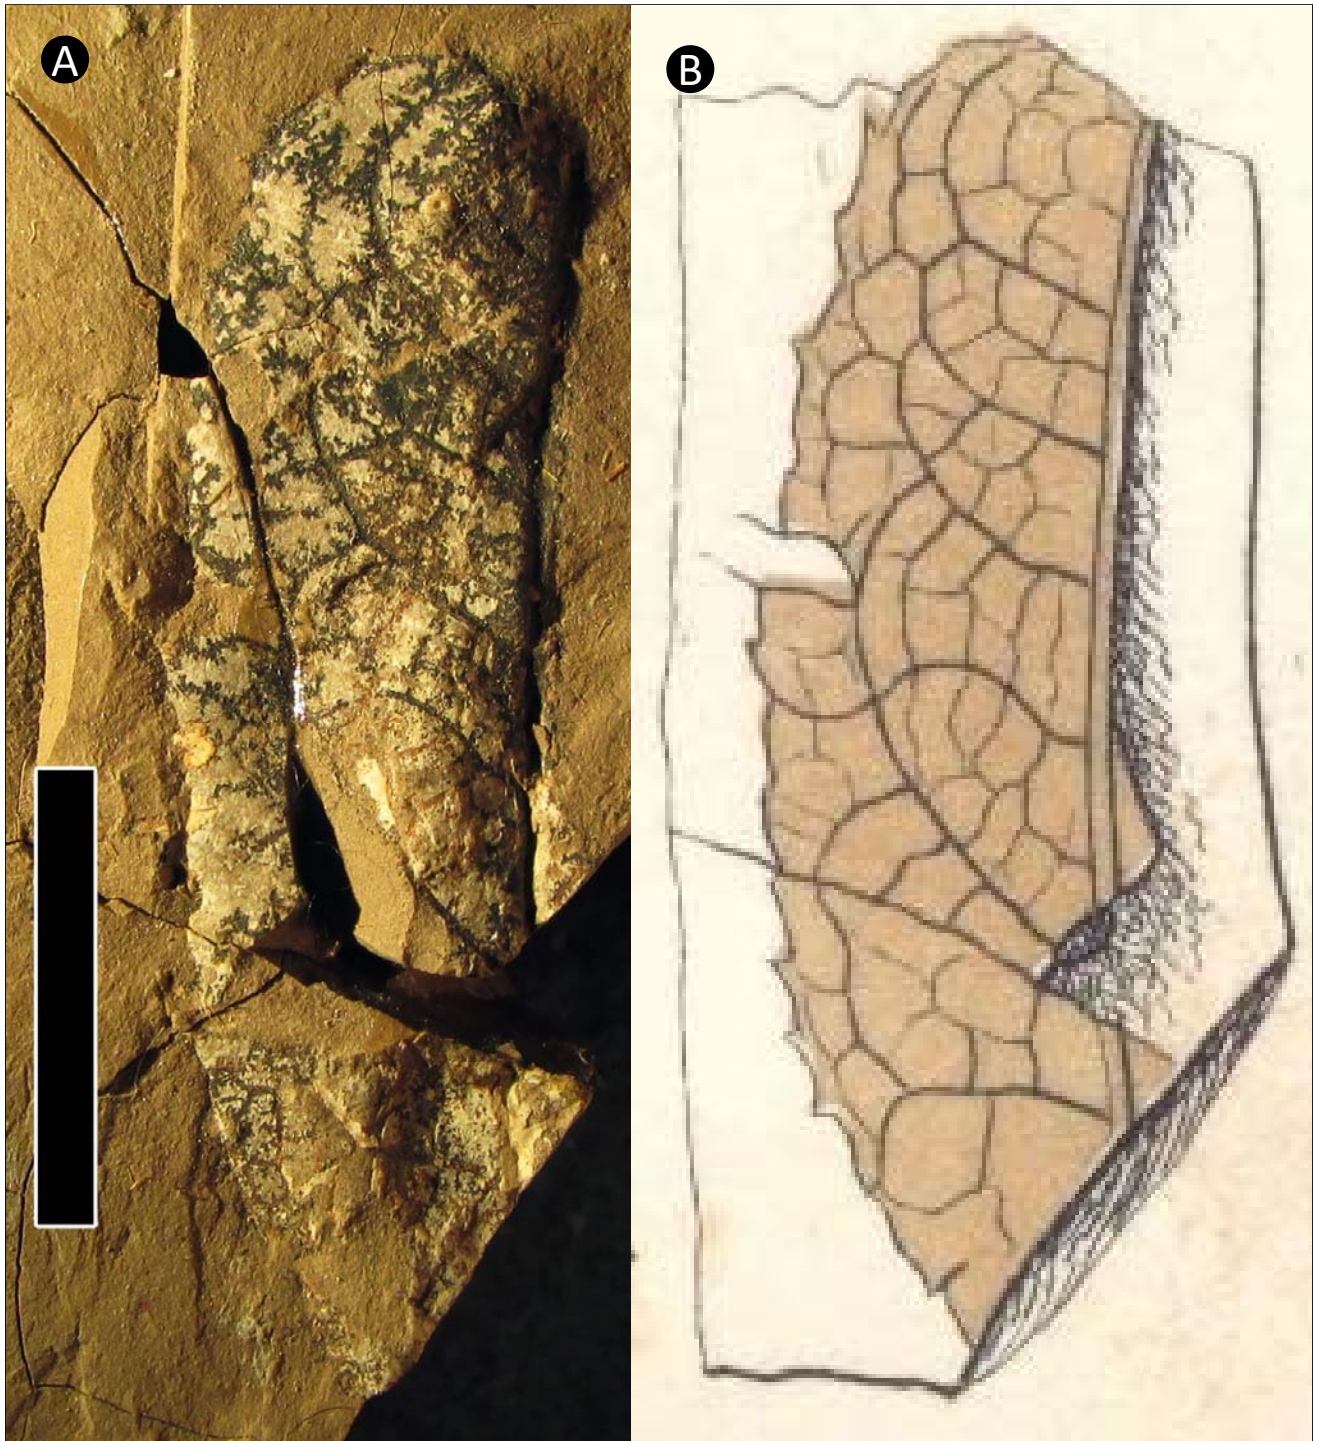

**Figure 2.** “*Clethra arborea*” (ETH-Z-ERDW 2843) revised as *Magnoliopsida incertae sedis* 1: **A**, photograph of the specimen; **B**, line drawing published by Heer (1857; pl. II, fig. 16). Scale bar is 1 cm long.



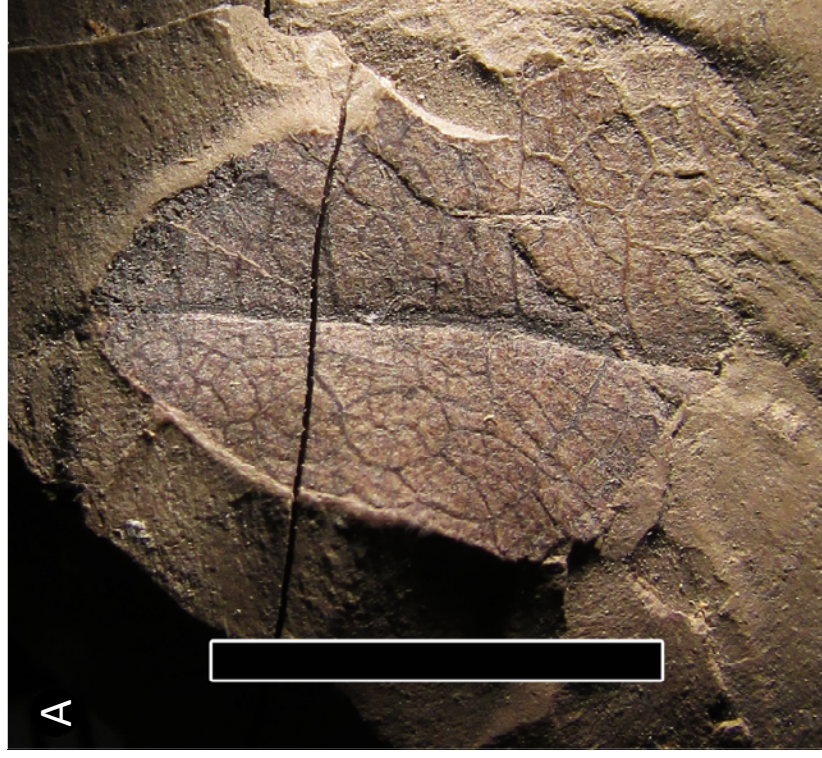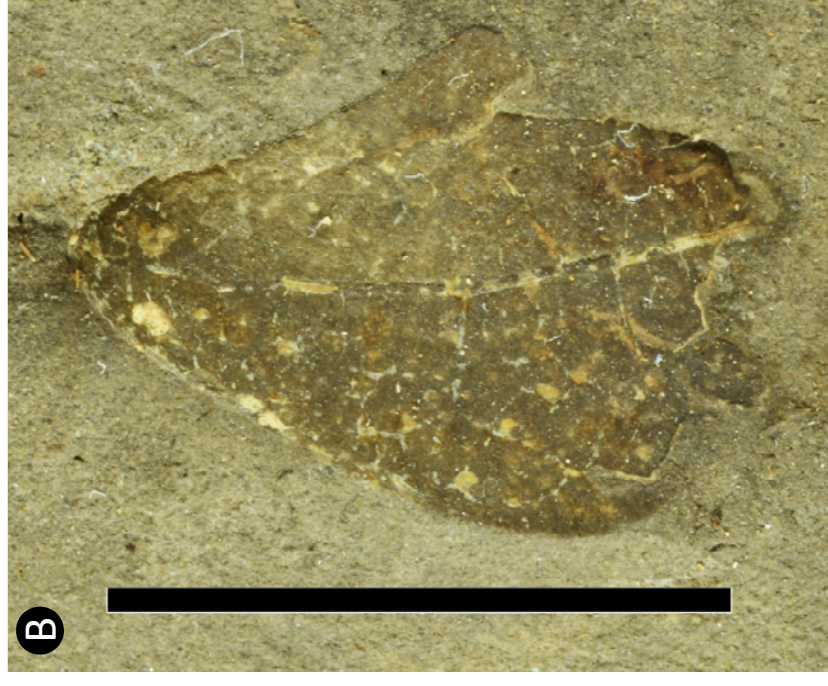

**Figure 3.** “*Pittosporum*” revised here as *Magnoliopsida incertae sedis* : **A**, ETH-Z-EDRW 5418; **B**, NHMUK: V19914. Scale bar is 0.5cm long.



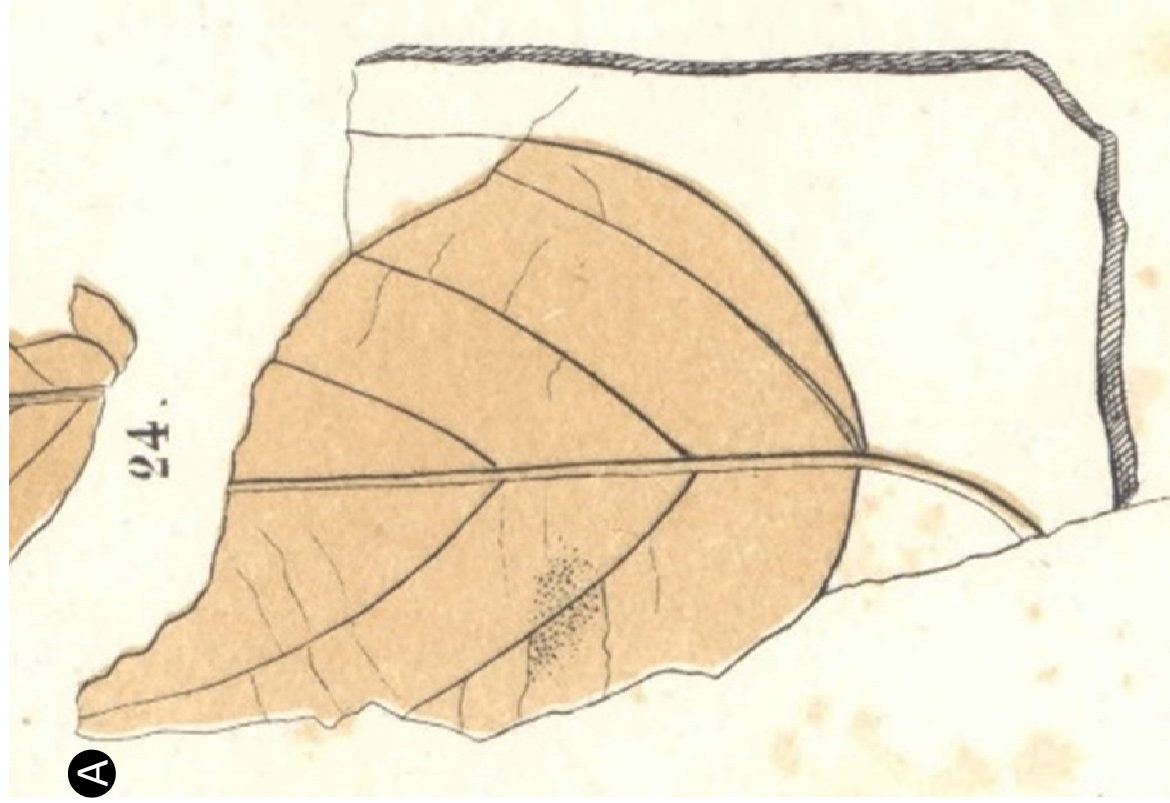

**Figure 4.** “*Rhamnus latifolius*” revised here as *Magnoliopsida incertae sedis* 3: **A**, line drawing published by Heer (1857, pl. I, fig. 25); **B**, photograph of the specimen ETH-Z-EDRW 5475. Scale bar is 1cm long.

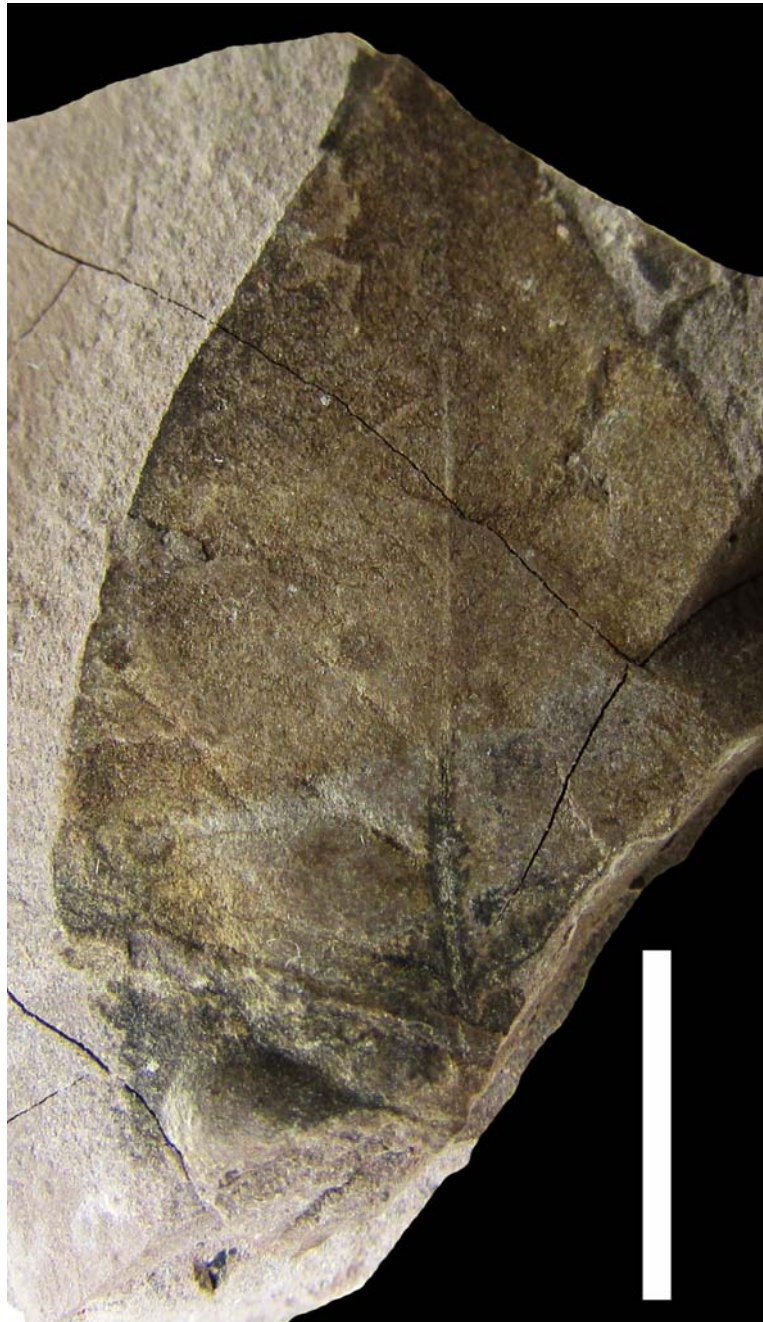

**Figure 5.** “*Vinca major*” (ETH-Z-ERDW 3703) revised as *Magnoliopsida incertae sedis* 4: Photograph of the specimen. Scale bar is 1 cm long.



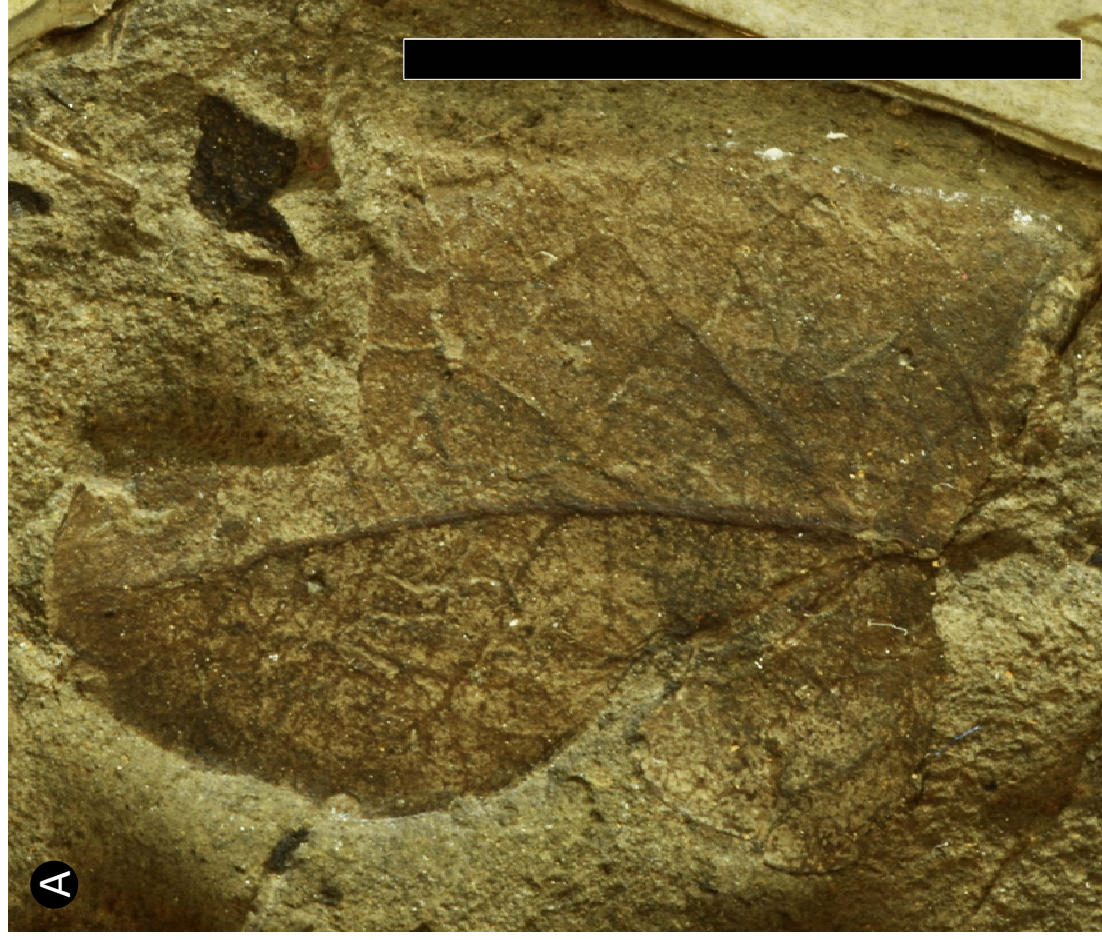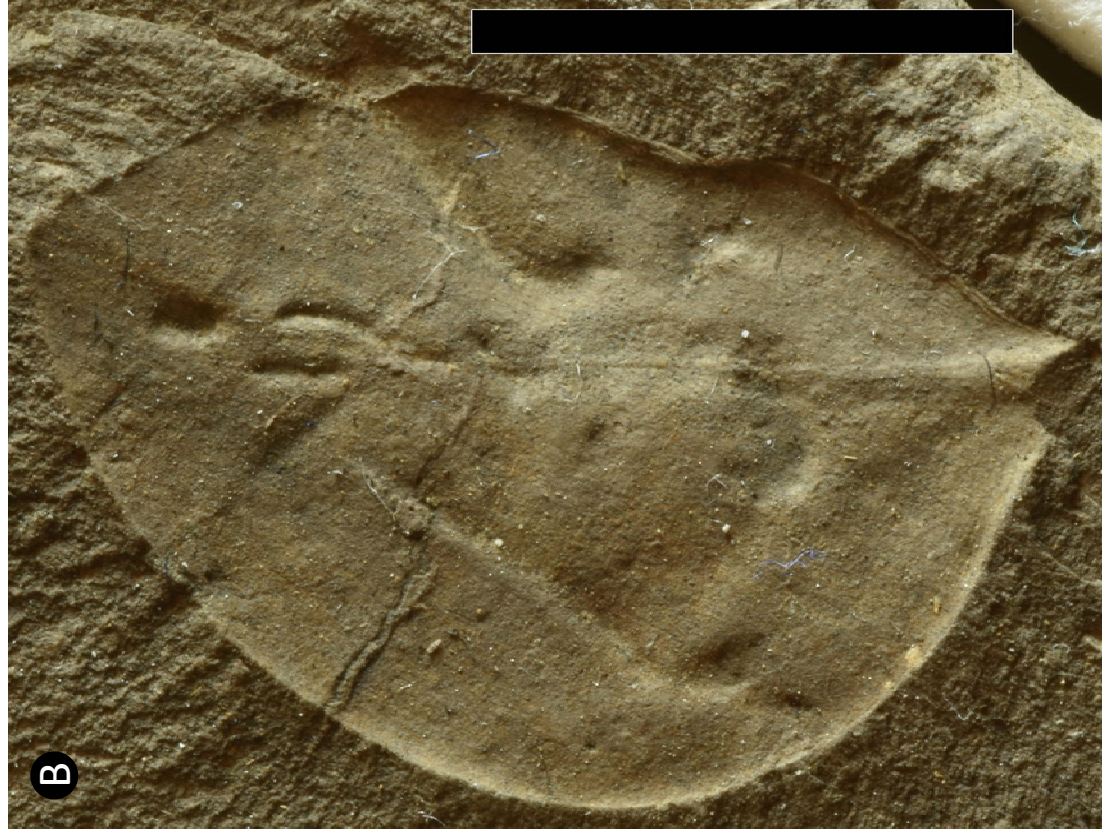

**Figure 6.** “Phyllites” specimens revised here as Magnoliopsida *incertae sedis* 5: **A**, *Phyllites lobulata* (NHMUK V19916); **B**, *Phyllites hymenaeoides* (NHMUK V19915). Scale bar is 1 cm long.



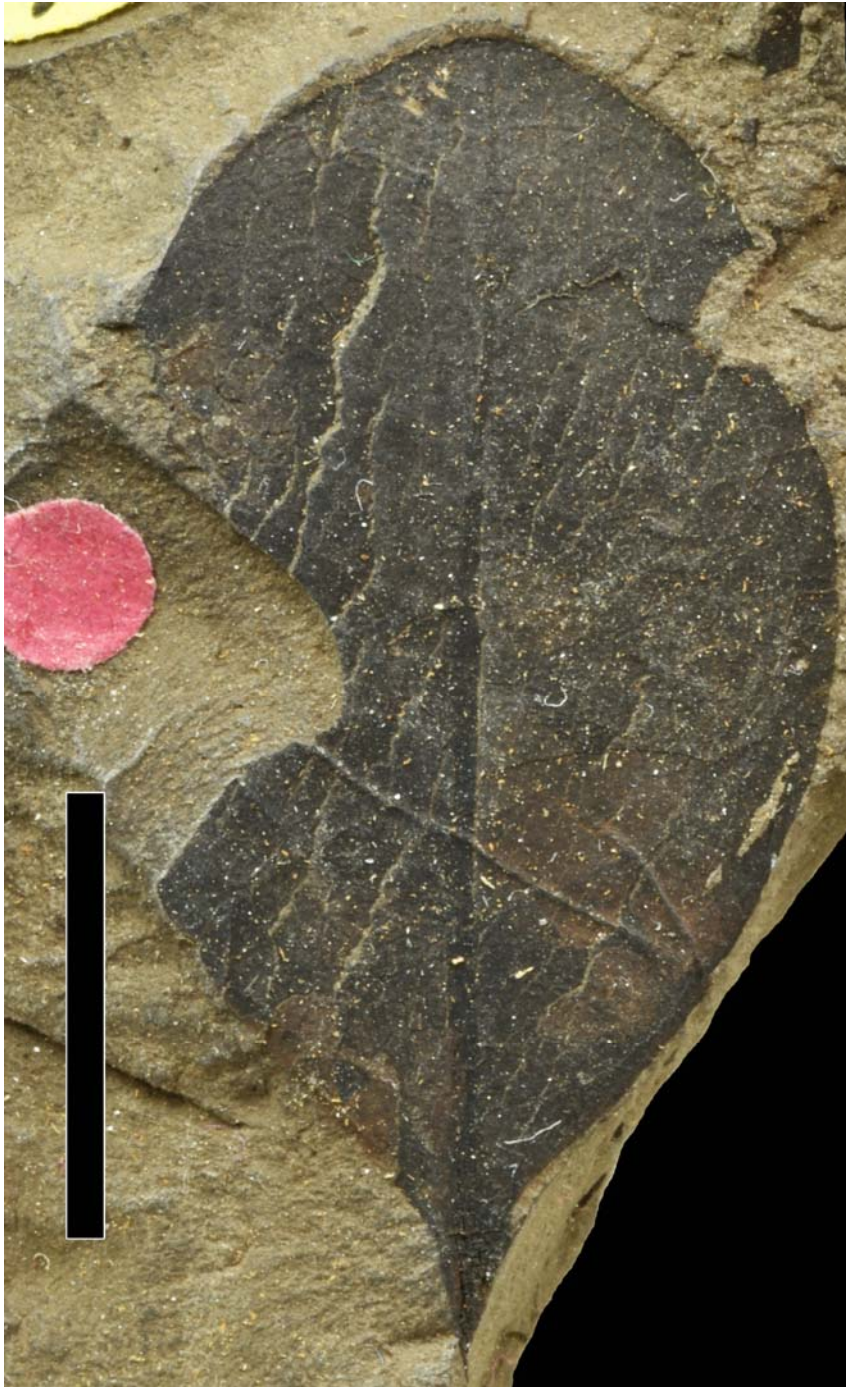

**Figure 7.** “*Phyllites*” (NHMUK V19917) specimen revised here as *Magnoliopsida incertae sedis* 5. Scale bar is 1 cm long.
